# Supplementary material for: Osa-miR11117 Targets OsPAO4 to Regulate Rice Immunity against the Blast Fungus Magnaporthe oryzae
Source: MDPI journal article supplement (doi:10.3390/ijms242216052), 2023-11-07
Supplement: s1 [file s1]

Table S1: List of Osa-miR11117 target genes

| miRNA_Acc.                      | Target_Acc.          | Expectation | UP | miRNA_s | miRNA_end | Target_start | Target_end | miRNA_aligned_fragment          | alignment           | Target_aligned_fragment         | Inhibition | Target_Desc.                                                             | Multiplicity |
|---------------------------------|----------------------|-------------|----|---------|-----------|--------------|------------|---------------------------------|---------------------|---------------------------------|------------|--------------------------------------------------------------------------|--------------|
| GGAGGGAGA<br>GGAAGAAGAT<br>GGGC | LOC_Os01g0186<br>0.1 | 3           | -1 | 1       | 23        | 165          | 187        | GGAGGGAGAG<br>GAAGAAGAUG<br>GGC | :.....<br>:::: :::: | GUCCAUCUUC<br>UUCCUCCCCU<br>UCG | Cleave     | cDNA transposon<br>protein, putative,<br>unclassified                    | 1            |
| GGAGGGAGA<br>GGAAGAAGAT<br>GGGC | LOC_Os01g0266<br>0.1 | 3           | -1 | 1       | 23        | 165          | 187        | GGAGGGAGAG<br>GAAGAAGAUG<br>GGC | :.....<br>:::: :::: | GUCCAUCUUC<br>UUCCUCCCCU<br>UCG | Cleave     | cDNA retrotransposon<br>protein, putative,<br>unclassified               | 1            |
| GGAGGGAGA<br>GGAAGAAGAT<br>GGGC | LOC_Os01g0478<br>0.1 | 3           | -1 | 1       | 23        | 165          | 187        | GGAGGGAGAG<br>GAAGAAGAUG<br>GGC | :.....<br>:::: :::: | GUCCAUCUUC<br>UUCCUCCCCU<br>UCG | Cleave     | cDNA retrotransposon<br>protein, putative,<br>unclassified,<br>expressed | 1            |
| GGAGGGAGA<br>GGAAGAAGAT<br>GGGC | LOC_Os01g0611<br>0.1 | 3           | -1 | 1       | 23        | 165          | 187        | GGAGGGAGAG<br>GAAGAAGAUG<br>GGC | :.....<br>:::: :::: | GUCCAUCUUC<br>UUCCUCCCCU<br>UCG | Cleave     | cDNA transposon<br>protein, putative,<br>unclassified,<br>expressed      | 1            |
| GGAGGGAGA<br>GGAAGAAGAT<br>GGGC | LOC_Os01g0916<br>0.1 | 3           | -1 | 1       | 23        | 165          | 187        | GGAGGGAGAG<br>GAAGAAGAUG<br>GGC | :.....<br>:::: :::: | GUCCAUCUUC<br>UUCCUCCCCU<br>UCG | Cleave     | cDNA transposon<br>protein, putative,<br>unclassified,<br>expressed      | 1            |
| GGAGGGAGA                       | LOC_Os               | 3           | -1 | 1       | 23        | 165          | 187        | GGAGGGAGAG                      | :.....              | GUCCAUCUUC                      | Cleave     | cDNA transposon                                                          | 1            |

|                                 |                          |     |    |   |    |     |     |                                 |                               |                                 |              |                                                                                                  |   |
|---------------------------------|--------------------------|-----|----|---|----|-----|-----|---------------------------------|-------------------------------|---------------------------------|--------------|--------------------------------------------------------------------------------------------------|---|
| GGAAGAAGAT<br>GGGC              | 01g0953<br>0.1           |     |    |   |    |     |     | GAAGAAGAUG<br>GGC               | ::: :::                       | UUCCUCCCCU<br>UCG               | vage         | protein, putative,<br>unclassified,<br>expressed                                                 |   |
| GGAGGGAGA<br>GGAAGAAGAT<br>GGGC | LOC_Os<br>01g1080<br>0.1 | 2   | -1 | 1 | 23 | 28  | 50  | GGAGGGAGAG<br>GAAGAAGAUG<br>GGC | :: :::<br>::: :::<br>::       | CCCCUUCUUC<br>UUCUUCUUC<br>UCC  | Clea<br>vage | cDNA pentatricop<br>eptide, putative,<br>expressed                                               | 1 |
| GGAGGGAGA<br>GGAAGAAGAT<br>GGGC | LOC_Os<br>01g1737<br>0.1 | 2.5 | -1 | 1 | 23 | 165 | 187 | GGAGGGAGAG<br>GAAGAAGAUG<br>GGC | ::: :::<br>::: :::<br>::: ::: | GUCCGUCUUC<br>UUCCUCUCUU<br>UCG | Clea<br>vage | cDNA retrotranspo<br>son protein,<br>putative,<br>unclassified,<br>expressed                     | 1 |
| GGAGGGAGA<br>GGAAGAAGAT<br>GGGC | LOC_Os<br>01g1920<br>0.1 | 2.5 | -1 | 1 | 23 | 165 | 187 | GGAGGGAGAG<br>GAAGAAGAUG<br>GGC | ::: :::<br>::: :::<br>::: ::: | GUCCGUCUUC<br>UUCCUCUCUU<br>UCG | Clea<br>vage | cDNA retrotranspo<br>son protein,<br>putative,<br>unclassified,<br>expressed                     | 1 |
| GGAGGGAGA<br>GGAAGAAGAT<br>GGGC | LOC_Os<br>01g2182<br>0.1 | 0.5 | -1 | 1 | 23 | 144 | 166 | GGAGGGAGAG<br>GAAGAAGAUG<br>GGC | ::: :::<br>::: :::<br>::      | ACCCAUCUUC<br>UUCCUCUUC<br>UCC  | Clea<br>vage | cDNA preprotein<br>translocase subunit<br>secA, chloroplast<br>precursor, putative,<br>expressed | 1 |
| GGAGGGAGA<br>GGAAGAAGAT<br>GGGC | LOC_Os<br>01g2241<br>0.1 | 3   | -1 | 1 | 23 | 165 | 187 | GGAGGGAGAG<br>GAAGAAGAUG<br>GGC | ::: :::<br>::: :::<br>GGC     | GUCCAUCUUC<br>UUCCUCCCCU<br>UCG | Clea<br>vage | cDNA transposon<br>protein, putative,<br>unclassified,<br>expressed                              | 1 |
| GGAGGGAGA                       | LOC_Os                   | 3   | -1 | 1 | 23 | 165 | 187 | GGAGGGAGAG                      | ::: :::                       | GUCCAUCUUC                      | Clea         | cDNA transposon                                                                                  | 1 |

|                                 |                          |     |    |   |    |     |     |                                 |                                                       |                                 |              |                                                                              |   |
|---------------------------------|--------------------------|-----|----|---|----|-----|-----|---------------------------------|-------------------------------------------------------|---------------------------------|--------------|------------------------------------------------------------------------------|---|
| GGAAGAAGAT<br>GGGC              | 01g2274<br>0.1           |     |    |   |    |     |     | GAAGAAGAUG<br>GGC               | : : : : : : : :<br>: : : : : : : :                    | UUCCUCCCCU<br>UCG               | vage         | protein, putative,<br>unclassified,<br>expressed                             |   |
| GGAGGGAGA<br>GGAAGAAGAT<br>GGGC | LOC_Os<br>01g2462<br>0.1 | 3   | -1 | 1 | 23 | 165 | 187 | GGAGGGAGAG<br>GAAGAAGAUG<br>GGC | : : : : : : : :<br>: : : : : : : :<br>: : : : : : : : | GUCCAUCUUC<br>UUCCUCCCCU<br>UCG | Clea<br>vage | cDNA transposon<br>protein, putative,<br>unclassified                        | 1 |
| GGAGGGAGA<br>GGAAGAAGAT<br>GGGC | LOC_Os<br>01g2780<br>0.1 | 2.5 | -1 | 1 | 23 | 165 | 187 | GGAGGGAGAG<br>GAAGAAGAUG<br>GGC | : : : : : : : :<br>: : : : : : : :<br>: : : : : : : : | GUCCGUCUUC<br>UUCCUCUCUU<br>UCG | Clea<br>vage | cDNA retrotranspo<br>son protein,<br>putative,<br>unclassified,<br>expressed | 1 |
| GGAGGGAGA<br>GGAAGAAGAT<br>GGGC | LOC_Os<br>01g2958<br>0.1 | 2.5 | -1 | 1 | 23 | 165 | 187 | GGAGGGAGAG<br>GAAGAAGAUG<br>GGC | : : : : ~ : : :<br>: : : : : : : :<br>: : : : : : : : | GUCCGUCUUC<br>UUCCUCUCUU<br>UCG | Clea<br>vage | cDNA retrotranspo<br>son protein,<br>putative,<br>unclassified,<br>expressed | 1 |
| GGAGGGAGA<br>GGAAGAAGAT<br>GGGC | LOC_Os<br>01g3755<br>0.1 | 3   | -1 | 1 | 23 | 165 | 187 | GGAGGGAGAG<br>GAAGAAGAUG<br>GGC | : : : : ~ : : :<br>: : : : : : : :<br>: : : : : : : : | GUCCAUCUUC<br>UUCCUCCCCU<br>UCG | Clea<br>vage | cDNA transposon<br>protein, putative,<br>unclassified,<br>expressed          | 1 |
| GGAGGGAGA<br>GGAAGAAGAT<br>GGGC | LOC_Os<br>01g3788<br>0.1 | 3   | -1 | 1 | 23 | 165 | 187 | GGAGGGAGAG<br>GAAGAAGAUG<br>GGC | : : : : ~ : : :<br>: : : : : : : :<br>: : : : : : : : | GUCCAUCUUC<br>UUCCUCCCCU<br>UCG | Clea<br>vage | cDNA transposon<br>protein, putative,<br>unclassified,<br>expressed          | 1 |
| GGAGGGAGA<br>GGAAGAAGAT         | LOC_Os<br>01g3793        | 2.5 | -1 | 1 | 23 | 165 | 187 | GGAGGGAGAG<br>GAAGAAGAUG        | : : : : ~ : : :<br>: : : : : : : :                    | GUCCAUCUUC<br>UUCCUCCCCC        | Clea<br>vage | cDNA retrotranspo<br>son protein,                                            | 1 |

| GGGC                            | 0.1                      |     |    |   |    |     |     | GGC                             |                         | UCG                             |              | putative,<br>unclassified,<br>expressed                                      |   |
|---------------------------------|--------------------------|-----|----|---|----|-----|-----|---------------------------------|-------------------------|---------------------------------|--------------|------------------------------------------------------------------------------|---|
| GGAGGGAGA<br>GGAAGAAGAT<br>GGGC | LOC_Os<br>01g3855<br>0.1 | 3   | -1 | 1 | 23 | 165 | 187 | GGAGGGAGAG<br>GAAGAAGAUG<br>GGC | .....<br>: : : :<br>GGC | GUCCAUCUUC<br>UUCCUCCCCU<br>UCG | Clea<br>vage | cDNA transposon<br>protein, putative,<br>unclassified,<br>expressed          | 1 |
| GGAGGGAGA<br>GGAAGAAGAT<br>GGGC | LOC_Os<br>01g4106<br>0.1 | 2.5 | -1 | 1 | 23 | 165 | 187 | GGAGGGAGAG<br>GAAGAAGAUG<br>GGC | .....<br>: : : :<br>GGC | GUCCGUCUUC<br>UUCCUCUCUU<br>UCG | Clea<br>vage | cDNA retrotranspo<br>son protein,<br>putative,<br>unclassified,<br>expressed | 1 |
| GGAGGGAGA<br>GGAAGAAGAT<br>GGGC | LOC_Os<br>01g4558<br>0.1 | 3   | -1 | 1 | 23 | 165 | 187 | GGAGGGAGAG<br>GAAGAAGAUG<br>GGC | .....<br>: : : :<br>GGC | GUCCAUCUUC<br>UUCCUCCCCU<br>UCG | Clea<br>vage | cDNA transposon<br>protein, putative,<br>unclassified                        | 1 |
| GGAGGGAGA<br>GGAAGAAGAT<br>GGGC | LOC_Os<br>01g4678<br>0.1 | 3   | -1 | 1 | 23 | 165 | 187 | GGAGGGAGAG<br>GAAGAAGAUG<br>GGC | .....<br>: : : :<br>GGC | GUCCAUCUUC<br>UUCCUCCCCU<br>UCG | Clea<br>vage | cDNA transposon<br>protein, putative,<br>unclassified,<br>expressed          | 1 |
| GGAGGGAGA<br>GGAAGAAGAT<br>GGGC | LOC_Os<br>01g4702<br>0.1 | 3   | -1 | 1 | 23 | 165 | 187 | GGAGGGAGAG<br>GAAGAAGAUG<br>GGC | .....<br>: : : :<br>GGC | GUCCAUCUUC<br>UUCCUCCCCU<br>UCG | Clea<br>vage | cDNA transposon<br>protein, putative,<br>unclassified,<br>expressed          | 1 |
| GGAGGGAGA<br>GGAAGAAGAT<br>GGGC | LOC_Os<br>01g4997<br>0.1 | 2.5 | -1 | 1 | 23 | 165 | 187 | GGAGGGAGAG<br>GAAGAAGAUG<br>GGC | .....<br>: : : :<br>GGC | GUCCGUCUUC<br>UUCCUCUCUU<br>UCG | Clea<br>vage | cDNA retrotranspo<br>son protein,<br>putative,                               | 1 |

|            |         |     |    |   |    |     |     |            |          |            |      |                   |           |
|------------|---------|-----|----|---|----|-----|-----|------------|----------|------------|------|-------------------|-----------|
| GGAGGGAGA  | LOC_Os  | 2.5 | -1 | 1 | 23 | 165 | 187 | GGAGGGAGAG | :.....   | GUCCGUCUUC | Clea | unclassified,     |           |
| GGAAGAAGAT | 01g5065 |     |    |   |    |     |     | GAAGAAGAUG | :.....   | UUCCUCUCUU | vage | expressed         |           |
| GGGC       | 0.1     |     |    |   |    |     |     | GGC        |          | UCG        |      | cDNA retrotranspo | 1         |
|            |         |     |    |   |    |     |     |            |          |            |      | son               | protein,  |
|            |         |     |    |   |    |     |     |            |          |            |      | putative,         |           |
|            |         |     |    |   |    |     |     |            |          |            |      | unclassified,     |           |
|            |         |     |    |   |    |     |     |            |          |            |      | expressed         |           |
| GGAGGGAGA  | LOC_Os  | 2.5 | -1 | 1 | 23 | 165 | 187 | GGAGGGAGAG | :.....   | GUCCGUCUUC | Clea | cDNA retrotranspo | 1         |
| GGAAGAAGAT | 01g5468 |     |    |   |    |     |     | GAAGAAGAUG | :.....   | UUCCUCUCUU | vage | son               | protein,  |
| GGGC       | 0.1     |     |    |   |    |     |     | GGC        |          | UCG        |      | putative,         |           |
|            |         |     |    |   |    |     |     |            |          |            |      | unclassified,     |           |
|            |         |     |    |   |    |     |     |            |          |            |      | expressed         |           |
| GGAGGGAGA  | LOC_Os  | 3   | -1 | 1 | 23 | 165 | 187 | GGAGGGAGAG | :.....   | GUCCAUCUUC | Clea | cDNA transposon   | 1         |
| GGAAGAAGAT | 01g6100 |     |    |   |    |     |     | GAAGAAGAUG | :...:... | UUCCUCCCCU | vage | protein,          | putative, |
| GGGC       | 0.1     |     |    |   |    |     |     | GGC        |          | UCG        |      | unclassified,     |           |
|            |         |     |    |   |    |     |     |            |          |            |      | expressed         |           |
| GGAGGGAGA  | LOC_Os  | 2.5 | -1 | 1 | 23 | 165 | 187 | GGAGGGAGAG | :.....   | GUCCGUCUUC | Clea | cDNA retrotranspo | 1         |
| GGAAGAAGAT | 01g6314 |     |    |   |    |     |     | GAAGAAGAUG | :.....   | UUCCUCUCUU | vage | son               | protein,  |
| GGGC       | 0.1     |     |    |   |    |     |     | GGC        |          | UCG        |      | putative,         |           |
|            |         |     |    |   |    |     |     |            |          |            |      | unclassified      |           |
| GGAGGGAGA  | LOC_Os  | 3   | -1 | 1 | 23 | 165 | 187 | GGAGGGAGAG | :.....   | GUCCAUCUUC | Clea | cDNA transposon   | 1         |
| GGAAGAAGAT | 01g7151 |     |    |   |    |     |     | GAAGAAGAUG | :...:... | UUCCUCCCCU | vage | protein,          | putative, |
| GGGC       | 0.1     |     |    |   |    |     |     | GGC        |          | UCG        |      | unclassified,     |           |
|            |         |     |    |   |    |     |     |            |          |            |      | expressed         |           |
| GGAGGGAGA  | LOC_Os  | 3   | -1 | 1 | 23 | 165 | 187 | GGAGGGAGAG | :.....   | GUCCAUCUUC | Clea | cDNA transposon   | 1         |
| GGAAGAAGAT | 01g7405 |     |    |   |    |     |     | GAAGAAGAUG | :...:... | UUCCUCCCCU | vage | protein,          | putative, |

|            |         |     |    |   |    |     |     |            |       |            |      |                                         |   |
|------------|---------|-----|----|---|----|-----|-----|------------|-------|------------|------|-----------------------------------------|---|
| GGGC       | 0.1     |     |    |   |    |     |     | GGC        |       | UCG        |      | unclassified                            |   |
| GGAGGGAGA  | LOC_Os  | 3   | -1 | 1 | 23 | 165 | 187 | GGAGGGAGAG | ..... | GUCCAUCUUC | Clea | cDNA retrotranspo                       | 1 |
| GGAAGAAGAT | 02g0414 |     |    |   |    |     |     | GAAGAAGAUG | ....  | UUCCUCCCCU | vage | son protein,                            |   |
| GGGC       | 0.1     |     |    |   |    |     |     | GGC        |       | UCG        |      | putative,<br>unclassified,<br>expressed |   |
| GGAGGGAGA  | LOC_Os  | 2.5 | -1 | 1 | 23 | 165 | 187 | GGAGGGAGAG | ..... | GUCCGUCUUC | Clea | cDNA retrotranspo                       | 1 |
| GGAAGAAGAT | 02g0429 |     |    |   |    |     |     | GAAGAAGAUG | ..... | UUCCUCUCUU | vage | son protein,                            |   |
| GGGC       | 0.1     |     |    |   |    |     |     | GGC        |       | UCG        |      | putative,<br>unclassified,<br>expressed |   |
| GGAGGGAGA  | LOC_Os  | 3   | -1 | 1 | 23 | 165 | 187 | GGAGGGAGAG | ..... | GUCCAUCUUC | Clea | cDNA retrotranspo                       | 1 |
| GGAAGAAGAT | 02g0604 |     |    |   |    |     |     | GAAGAAGAUG | ....  | UUCCUCCCCU | vage | son protein,                            |   |
| GGGC       | 0.1     |     |    |   |    |     |     | GGC        |       | UCG        |      | putative,<br>unclassified,<br>expressed |   |
| GGAGGGAGA  | LOC_Os  | 2.5 | -1 | 1 | 23 | 165 | 187 | GGAGGGAGAG | ..... | GUCCGUCUUC | Clea | cDNA retrotranspo                       | 1 |
| GGAAGAAGAT | 02g1742 |     |    |   |    |     |     | GAAGAAGAUG | ..... | UUCCUCUCUU | vage | son protein,                            |   |
| GGGC       | 0.1     |     |    |   |    |     |     | GGC        |       | UCG        |      | putative,<br>unclassified,<br>expressed |   |
| GGAGGGAGA  | LOC_Os  | 3   | -1 | 1 | 23 | 165 | 187 | GGAGGGAGAG | ..... | GUCCGUCUUC | Clea | cDNA retrotranspo                       | 1 |
| GGAAGAAGAT | 02g2242 |     |    |   |    |     |     | GAAGAAGAUG | ..... | UUCCUCUCUU | vage | son protein,                            |   |
| GGGC       | 0.1     |     |    |   |    |     |     | GGC        |       | UUG        |      | putative,<br>unclassified,<br>expressed |   |

|                                 |                          |     |    |   |    |     |     |                                 |                       |                                |              |                                                                                            |   |
|---------------------------------|--------------------------|-----|----|---|----|-----|-----|---------------------------------|-----------------------|--------------------------------|--------------|--------------------------------------------------------------------------------------------|---|
| GGAGGGAGA<br>GGAAGAAGAT<br>GGGC | LOC_Os<br>02g3417<br>0.1 | 3   | -1 | 1 | 23 | 165 | 187 | GGAGGGAGAG<br>GAAGAAGAUG<br>GGC | :.....<br>: : :<br>:  | GUCCAUCUUC<br>UUCCUCCCU<br>UCG | Clea<br>vage | cDNA transposon<br>protein, putative,<br>unclassified,<br>expressed                        | 1 |
| GGAGGGAGA<br>GGAAGAAGAT<br>GGGC | LOC_Os<br>02g3670<br>0.1 | 1.5 | -1 | 1 | 23 | 32  | 54  | GGAGGGAGAG<br>GAAGAAGAUG<br>GGC | :.....<br>:.....<br>: | GCUCGUCUUC<br>UUCCUCUUC<br>UUC | Clea<br>vage | cDNA sucrose<br>transporter<br>BoSUT1, putative,<br>expressed                              | 1 |
| GGAGGGAGA<br>GGAAGAAGAT<br>GGGC | LOC_Os<br>02g3930<br>0.1 | 1.5 | -1 | 1 | 23 | 1   | 23  | GGAGGGAGAG<br>GAAGAAGAUG<br>GGC | :.....<br>:.....<br>: | AGCCGUCUUC<br>UUCUUCUUC<br>UCC | Clea<br>vage | cDNA RNA-<br>binding protein<br>Luc7-like,<br>putative, expressed                          | 1 |
| GGAGGGAGA<br>GGAAGAAGAT<br>GGGC | LOC_Os<br>02g4155<br>0.3 | 1   | -1 | 1 | 23 | 308 | 330 | GGAGGGAGAG<br>GAAGAAGAUG<br>GGC | :.....<br>:.....<br>: | GCUCAUCUUC<br>UUCUUCUUC<br>UCC | Clea<br>vage | cDNA FAD<br>binding domain of<br>DNA photolyase<br>domain containing<br>protein, expressed | 1 |
| GGAGGGAGA<br>GGAAGAAGAT<br>GGGC | LOC_Os<br>02g4841<br>0.1 | 2.5 | -1 | 1 | 23 | 165 | 187 | GGAGGGAGAG<br>GAAGAAGAUG<br>GGC | :.....<br>:.....<br>: | GUCCGUCUUC<br>UUCCUCUCU<br>UCG | Clea<br>vage | cDNA retrotranspo<br>son protein,<br>putative,<br>unclassified,<br>expressed               | 1 |
| GGAGGGAGA<br>GGAAGAAGAT<br>GGGC | LOC_Os<br>02g5207<br>0.1 | 2   | -1 | 1 | 23 | 165 | 187 | GGAGGGAGAG<br>GAAGAAGAUG<br>GGC | :.....<br>:.....<br>: | GUCCAUCUUC<br>UUCCUCUCU<br>UCG | Clea<br>vage | cDNA retrotranspo<br>son protein,<br>putative,<br>unclassified,                            | 1 |

|            |         |   |    |   |    |    |    |            |          |            |      |                                                       |   |
|------------|---------|---|----|---|----|----|----|------------|----------|------------|------|-------------------------------------------------------|---|
| GGAGGGAGA  | LOC_Os  | 1 | -1 | 1 | 23 | 65 | 87 | GGAGGGAGAG | :::~::~: | UCUCAUCUUC | Clea | expressed                                             |   |
| GGAAGAAGAT | 02g5741 |   |    |   |    |    |    | GAAGAAGAUG | :::~::~: | UUCUUCUCCC | vage | cDNA OTU-like                                         | 1 |
| GGGC       | 0.1     |   |    |   |    |    |    | GGC        | ::       | UCU        |      | cysteine protease family protein, putative, expressed |   |
| GGAGGGAGA  | LOC_Os  | 1 | -1 | 1 | 23 | 65 | 87 | GGAGGGAGAG | :::~::~: | UCUCAUCUUC | Clea | cDNA OTU-like                                         | 1 |
| GGAAGAAGAT | 02g5741 |   |    |   |    |    |    | GAAGAAGAUG | :::~::~: | UUCUUCUCCC | vage | cysteine protease family protein, putative, expressed |   |
| GGGC       | 0.10    |   |    |   |    |    |    | GGC        | ::       | UCU        |      |                                                       |   |
| GGAGGGAGA  | LOC_Os  | 1 | -1 | 1 | 23 | 65 | 87 | GGAGGGAGAG | :::~::~: | UCUCAUCUUC | Clea | cDNA OTU-like                                         | 1 |
| GGAAGAAGAT | 02g5741 |   |    |   |    |    |    | GAAGAAGAUG | :::~::~: | UUCUUCUCCC | vage | cysteine protease family protein, putative, expressed |   |
| GGGC       | 0.2     |   |    |   |    |    |    | GGC        | ::       | UCU        |      |                                                       |   |
| GGAGGGAGA  | LOC_Os  | 1 | -1 | 1 | 23 | 65 | 87 | GGAGGGAGAG | :::~::~: | UCUCAUCUUC | Clea | cDNA OTU-like                                         | 1 |
| GGAAGAAGAT | 02g5741 |   |    |   |    |    |    | GAAGAAGAUG | :::~::~: | UUCUUCUCCC | vage | cysteine protease family protein, putative, expressed |   |
| GGGC       | 0.3     |   |    |   |    |    |    | GGC        | ::       | UCU        |      |                                                       |   |
| GGAGGGAGA  | LOC_Os  | 1 | -1 | 1 | 23 | 65 | 87 | GGAGGGAGAG | :::~::~: | UCUCAUCUUC | Clea | cDNA OTU-like                                         | 1 |
| GGAAGAAGAT | 02g5741 |   |    |   |    |    |    | GAAGAAGAUG | :::~::~: | UUCUUCUCCC | vage | cysteine protease family protein, putative, expressed |   |
| GGGC       | 0.4     |   |    |   |    |    |    | GGC        | ::       | UCU        |      |                                                       |   |
| GGAGGGAGA  | LOC_Os  | 1 | -1 | 1 | 23 | 65 | 87 | GGAGGGAGAG | :::~::~: | UCUCAUCUUC | Clea | cDNA OTU-like                                         | 1 |
| GGAAGAAGAT | 02g5741 |   |    |   |    |    |    | GAAGAAGAUG | :::~::~: | UUCUUCUCCC | vage | cysteine protease family protein, putative, expressed |   |
| GGGC       | 0.5     |   |    |   |    |    |    | GGC        | ::       | UCU        |      |                                                       |   |
| GGAGGGAGA  | LOC_Os  | 1 | -1 | 1 | 23 | 65 | 87 | GGAGGGAGAG | :::~::~: | UCUCAUCUUC | Clea | cDNA OTU-like                                         | 1 |



|                                 |                          |     |    |   |    |     |     |                                 |                        |                                 |              |                                                                     |                                   |   |
|---------------------------------|--------------------------|-----|----|---|----|-----|-----|---------------------------------|------------------------|---------------------------------|--------------|---------------------------------------------------------------------|-----------------------------------|---|
| GGAAGAAGAT<br>GGGC              | 02g5741<br>0.6           |     |    |   |    |     |     | GAAGAAGAUG<br>GGC               | :.....<br>:.           | UUCUUCUCCC<br>UCU               | vage         | cysteine<br>family<br>putative, expressed                           | protease<br>protein,<br>expressed |   |
| GGAGGGAGA<br>GGAAGAAGAT<br>GGGC | LOC_Os<br>02g5741<br>0.7 | 1   | -1 | 1 | 23 | 65  | 87  | GGAGGGAGAG<br>GAAGAAGAUG<br>GGC | :.....<br>:.....<br>:. | UCUCAUCUUC<br>UUCUUCUCCC<br>UCU | Clea<br>vage | cDNA OTU-like<br>cysteine<br>family<br>putative, expressed          | protease<br>protein,<br>expressed | 1 |
| GGAGGGAGA<br>GGAAGAAGAT<br>GGGC | LOC_Os<br>02g5741<br>0.8 | 1   | -1 | 1 | 23 | 65  | 87  | GGAGGGAGAG<br>GAAGAAGAUG<br>GGC | :.....<br>:.....<br>:. | UCUCAUCUUC<br>UUCUUCUCCC<br>UCU | Clea<br>vage | cDNA OTU-like<br>cysteine<br>family<br>putative, expressed          | protease<br>protein,<br>expressed | 1 |
| GGAGGGAGA<br>GGAAGAAGAT<br>GGGC | LOC_Os<br>02g5741<br>0.9 | 1   | -1 | 1 | 23 | 65  | 87  | GGAGGGAGAG<br>GAAGAAGAUG<br>GGC | :.....<br>:.....<br>:. | UCUCAUCUUC<br>UUCUUCUCCC<br>UCU | Clea<br>vage | cDNA OTU-like<br>cysteine<br>family<br>putative, expressed          | protease<br>protein,<br>expressed | 1 |
| GGAGGGAGA<br>GGAAGAAGAT<br>GGGC | LOC_Os<br>03g0106<br>0.1 | 2.5 | -1 | 1 | 23 | 165 | 187 | GGAGGGAGAG<br>GAAGAAGAUG<br>GGC | :.....<br>:.....       | GUCCGUCUUC<br>UUCCUCUCUU<br>UCG | Clea<br>vage | cDNA retrotranspo<br>son<br>putative,<br>unclassified,<br>expressed | protein,<br>expressed             | 1 |
| GGAGGGAGA<br>GGAAGAAGAT<br>GGGC | LOC_Os<br>03g0140<br>0.1 | 2.5 | -1 | 1 | 23 | 165 | 187 | GGAGGGAGAG<br>GAAGAAGAUG<br>GGC | :.....<br>:.....       | GUCCGUCUUC<br>UUCCUCUCUU<br>UCG | Clea<br>vage | cDNA retrotranspo<br>son<br>putative,<br>unclassified,<br>expressed | protein,<br>expressed             | 1 |
| GGAGGGAGA                       | LOC_Os                   | 2.5 | -1 | 1 | 23 | 165 | 187 | GGAGGGAGAG                      | :.....                 | GUCCGUCUUC                      | Clea         | cDNA retrotranspo                                                   |                                   | 1 |

|                                 |                          |     |    |   |    |     |     |                                 |                                         |                                 |                   |                             |                                                     |   |
|---------------------------------|--------------------------|-----|----|---|----|-----|-----|---------------------------------|-----------------------------------------|---------------------------------|-------------------|-----------------------------|-----------------------------------------------------|---|
| GGAAGAAGAT<br>GGGC              | 03g0500<br>0.1           |     |    |   |    |     |     |                                 | GAAGAAGAUG<br>GGC                       | : : : : : : : :<br>:            | UUCCUCUCUU<br>UCG | vage<br>son                 | protein,<br>putative,<br>unclassified,<br>expressed |   |
| GGAGGGAGA<br>GGAAGAAGAT<br>GGGC | LOC_Os<br>03g0627<br>0.1 | 3   | -1 | 1 | 23 | 165 | 187 | GGAGGGAGAG<br>GAAGAAGAUG<br>GGC | : : : : : : : :<br>: : : : : : : :<br>: | GUCCGUCUUC<br>UUCCUUUCCU<br>UUG | Clea<br>vage      | cDNA retrotranspo<br>son    | protein,<br>putative,<br>unclassified,<br>expressed | 1 |
| GGAGGGAGA<br>GGAAGAAGAT<br>GGGC | LOC_Os<br>03g0702<br>0.1 | 3   | -1 | 1 | 23 | 165 | 187 | GGAGGGAGAG<br>GAAGAAGAUG<br>GGC | : : : : : : : :<br>: : : : : : : :<br>: | GUCCAUCUUC<br>UUCCUCCCCU<br>UCG | Clea<br>vage      | cDNA retrotranspo<br>son    | protein,<br>putative,<br>unclassified,<br>expressed | 1 |
| GGAGGGAGA<br>GGAAGAAGAT<br>GGGC | LOC_Os<br>03g1561<br>0.1 | 2.5 | -1 | 1 | 23 | 165 | 187 | GGAGGGAGAG<br>GAAGAAGAUG<br>GGC | : : : : : : : :<br>: : : : : : : :<br>: | GUCCGUCUUC<br>UUCCUCUCUU<br>UCG | Clea<br>vage      | cDNA retrotranspo<br>son    | protein,<br>putative,<br>unclassified,<br>expressed | 1 |
| GGAGGGAGA<br>GGAAGAAGAT<br>GGGC | LOC_Os<br>03g2428<br>0.1 | 3   | -1 | 1 | 23 | 165 | 187 | GGAGGGAGAG<br>GAAGAAGAUG<br>GGC | : : : : : : : :<br>: : : : : : : :<br>: | GUCCAUCUUC<br>UUCCUCCCCU<br>UCG | Clea<br>vage      | cDNA transposon<br>protein, | putative,<br>unclassified,<br>expressed             | 1 |
| GGAGGGAGA<br>GGAAGAAGAT<br>GGGC | LOC_Os<br>03g2437<br>0.1 | 3   | -1 | 1 | 23 | 165 | 187 | GGAGGGAGAG<br>GAAGAAGAUG<br>GGC | : : : : : : : :<br>: : : : : : : :<br>: | GUCCAUCUUC<br>UUCCUCCCCU<br>UCG | Clea<br>vage      | cDNA transposon<br>protein, | putative,<br>unclassified,                          | 1 |

|                                 |                          |     |    |   |    |     |     |                                 |                       |                                 |              |                                                                                                  |   |
|---------------------------------|--------------------------|-----|----|---|----|-----|-----|---------------------------------|-----------------------|---------------------------------|--------------|--------------------------------------------------------------------------------------------------|---|
| GGAGGGAGA<br>GGAAGAAGAT<br>GGGC | LOC_Os<br>03g3667<br>0.1 | 2.5 | -1 | 1 | 23 | 165 | 187 | GGAGGGAGAG<br>GAAGAAGAUG<br>GGC | :.....<br>:.....<br>: | GUCCGUCUUC<br>UUCCUCUCUU<br>UCG | Clea<br>vage | expressed<br>cDNA retrotranspo<br>son protein,<br>putative, Ty3-<br>gypsy subclass,<br>expressed | 1 |
| GGAGGGAGA<br>GGAAGAAGAT<br>GGGC | LOC_Os<br>03g4199<br>0.1 | 2.5 | -1 | 1 | 23 | 165 | 187 | GGAGGGAGAG<br>GAAGAAGAUG<br>GGC | :.....<br>:.....<br>: | GUCCGUCUUC<br>UUCCUCUCUU<br>UCG | Clea<br>vage | expressed<br>cDNA retrotranspo<br>son protein,<br>putative,<br>unclassified,<br>expressed        | 1 |
| GGAGGGAGA<br>GGAAGAAGAT<br>GGGC | LOC_Os<br>03g4440<br>0.1 | 2   | -1 | 1 | 23 | 165 | 187 | GGAGGGAGAG<br>GAAGAAGAUG<br>GGC | :.....<br>:.....<br>: | GUCCGUCUUC<br>UUCCUCUCCU<br>UCG | Clea<br>vage | expressed<br>cDNA retrotranspo<br>son protein,<br>putative,<br>unclassified,<br>expressed        | 1 |
| GGAGGGAGA<br>GGAAGAAGAT<br>GGGC | LOC_Os<br>03g4759<br>0.1 | 2.5 | -1 | 1 | 23 | 165 | 187 | GGAGGGAGAG<br>GAAGAAGAUG<br>GGC | :.....<br>:.....<br>: | GUCCGUCUUC<br>UUCCUCUCUU<br>UCG | Clea<br>vage | expressed<br>cDNA retrotranspo<br>son protein,<br>putative, Ty3-<br>gypsy subclass,<br>expressed | 1 |
| GGAGGGAGA<br>GGAAGAAGAT<br>GGGC | LOC_Os<br>03g5944<br>0.1 | 1   | -1 | 1 | 23 | 66  | 88  | GGAGGGAGAG<br>GAAGAAGAUG<br>GGC | :: :<br>:.....<br>:   | AUCCUUCUUC<br>UUCCUCUCCC<br>UCC | Clea<br>vage | cDNA dirigent,<br>putative, expressed                                                            | 1 |
| GGAGGGAGA<br>GGAAGAAGAT         | LOC_Os<br>03g6364        | 3   | -1 | 1 | 23 | 165 | 187 | GGAGGGAGAG<br>GAAGAAGAUG        | :.....<br>: : :<br>:  | GUCCAUCUUC<br>UUCCUCCCCU        | Clea<br>vage | cDNA transposon<br>protein, putative,                                                            | 1 |

|            |         |     |    |   |    |     |     |            |            |            |      |                                         |   |
|------------|---------|-----|----|---|----|-----|-----|------------|------------|------------|------|-----------------------------------------|---|
| GGGC       | 0.1     |     |    |   |    |     |     | GGC        |            | UCG        |      | unclassified,<br>expressed              |   |
| GGAGGGAGA  | LOC_Os  | 3   | -1 | 1 | 23 | 165 | 187 | GGAGGGAGAG | :.....     | GUCCAUCUUC | Clea | cDNA transposon                         | 1 |
| GGAAGAAGAT | 03g6380 |     |    |   |    |     |     | GAAGAAGAUG | :...: ...: | UUCCUCCCCU | vage | protein, putative,                      |   |
| GGGC       | 0.1     |     |    |   |    |     |     | GGC        |            | UCG        |      | unclassified,<br>expressed              |   |
| GGAGGGAGA  | LOC_Os  | 3   | -1 | 1 | 23 | 165 | 187 | GGAGGGAGAG | :.....     | GUCCAUCUUC | Clea | cDNA transposon                         | 1 |
| GGAAGAAGAT | 04g0553 |     |    |   |    |     |     | GAAGAAGAUG | :...: ...: | UUCCUCCCCU | vage | protein, putative,                      |   |
| GGGC       | 0.1     |     |    |   |    |     |     | GGC        |            | UCG        |      | unclassified,<br>expressed              |   |
| GGAGGGAGA  | LOC_Os  | 2.5 | -1 | 1 | 23 | 165 | 187 | GGAGGGAGAG | :.....     | GUCCGUCUUC | Clea | cDNA retrotranspo                       | 1 |
| GGAAGAAGAT | 04g1117 |     |    |   |    |     |     | GAAGAAGAUG | :.....     | UUCCUCUCUU | vage | son protein,                            |   |
| GGGC       | 0.1     |     |    |   |    |     |     | GGC        |            | UCG        |      | putative,<br>unclassified,<br>expressed |   |
| GGAGGGAGA  | LOC_Os  | 1.5 | -1 | 1 | 23 | 294 | 316 | GGAGGGAGAG | :.....     | GUUCAUCUUC | Clea | cDNA transposon                         | 1 |
| GGAAGAAGAT | 04g1212 |     |    |   |    |     |     | GAAGAAGAUG | :.....     | UUCCUCUCUU | vage | protein, putative,                      |   |
| GGGC       | 0.1     |     |    |   |    |     |     | GGC        | .          | UCU        |      | unclassified,<br>expressed              |   |
| GGAGGGAGA  | LOC_Os  | 2.5 | -1 | 1 | 23 | 165 | 187 | GGAGGGAGAG | :.....     | GUCCGUCUUC | Clea | cDNA retrotranspo                       | 1 |
| GGAAGAAGAT | 04g1278 |     |    |   |    |     |     | GAAGAAGAUG | :.....     | UUCCUCUCUU | vage | son protein,                            |   |
| GGGC       | 0.1     |     |    |   |    |     |     | GGC        |            | UCG        |      | putative,<br>unclassified               |   |
| GGAGGGAGA  | LOC_Os  | 3   | -1 | 1 | 23 | 165 | 187 | GGAGGGAGAG | :.....     | GUCCAUCUUC | Clea | cDNA transposon                         | 1 |
| GGAAGAAGAT | 04g1727 |     |    |   |    |     |     | GAAGAAGAUG | :...: ...: | UUCCUCCCCU | vage | protein, putative,                      |   |
| GGGC       | 0.1     |     |    |   |    |     |     | GGC        |            | UCG        |      | unclassified,                           |   |

|                                 |                          |     |    |   |    |     |     |                                 |                       |                                 |              |                                                                                           |   |
|---------------------------------|--------------------------|-----|----|---|----|-----|-----|---------------------------------|-----------------------|---------------------------------|--------------|-------------------------------------------------------------------------------------------|---|
| GGAGGGAGA<br>GGAAGAAGAT<br>GGGC | LOC_Os<br>04g2005<br>4.1 | 2.5 | -1 | 1 | 23 | 165 | 187 | GGAGGGAGAG<br>GAAGAAGAUG<br>GGC | :.....<br>:.....<br>: | GUCCGUCUUC<br>UUCCUCUCUU<br>UCG | Clea<br>vage | expressed<br>cDNA retrotranspo<br>son protein,<br>putative,<br>unclassified,<br>expressed | 1 |
| GGAGGGAGA<br>GGAAGAAGAT<br>GGGC | LOC_Os<br>04g2123<br>0.1 | 3   | -1 | 1 | 23 | 165 | 187 | GGAGGGAGAG<br>GAAGAAGAUG<br>GGC | :.....<br>: : :<br>:  | GUCCAUCUUC<br>UUCCUCCCCU<br>UCG | Clea<br>vage | expressed<br>cDNA retrotranspo<br>son protein,<br>putative,<br>unclassified,<br>expressed | 1 |
| GGAGGGAGA<br>GGAAGAAGAT<br>GGGC | LOC_Os<br>04g2126<br>0.1 | 3   | -1 | 1 | 23 | 165 | 187 | GGAGGGAGAG<br>GAAGAAGAUG<br>GGC | :.....<br>: : :<br>:  | GUCCAUCUUC<br>UUCCUCCCCU<br>UCG | Clea<br>vage | cDNA transposon<br>protein, putative,<br>unclassified,<br>expressed                       | 1 |
| GGAGGGAGA<br>GGAAGAAGAT<br>GGGC | LOC_Os<br>04g2388<br>0.1 | 3   | -1 | 1 | 23 | 165 | 187 | GGAGGGAGAG<br>GAAGAAGAUG<br>GGC | :.....<br>: : :<br>:  | GUCCAUCUUC<br>UUCCUCCCCU<br>UCG | Clea<br>vage | expressed<br>cDNA transposon<br>protein, putative,<br>unclassified,<br>expressed          | 1 |
| GGAGGGAGA<br>GGAAGAAGAT<br>GGGC | LOC_Os<br>04g2722<br>0.1 | 3   | -1 | 1 | 23 | 165 | 187 | GGAGGGAGAG<br>GAAGAAGAUG<br>GGC | :.....<br>: : :<br>:  | GUCCAUCUUC<br>UUCCUCCCCU<br>UCG | Clea<br>vage | expressed<br>cDNA transposon<br>protein, putative,<br>unclassified,<br>expressed          | 1 |
| GGAGGGAGA<br>GGAAGAAGAT<br>GGGC | LOC_Os<br>04g2787<br>0.1 | 2.5 | -1 | 1 | 23 | 165 | 187 | GGAGGGAGAG<br>GAAGAAGAUG<br>GGC | :.....<br>:.....<br>: | GUCCGUCUUC<br>UUCCUCUCUU<br>UCG | Clea<br>vage | expressed<br>cDNA retrotranspo<br>son protein,<br>putative,                               | 1 |

|                                 |                          |     |    |   |    |     |     |                                 |                       |                                 |              |                                                                                                 |   |
|---------------------------------|--------------------------|-----|----|---|----|-----|-----|---------------------------------|-----------------------|---------------------------------|--------------|-------------------------------------------------------------------------------------------------|---|
| GGAGGGAGA<br>GGAAGAAGAT<br>GGGC | LOC_Os<br>04g3185<br>0.1 | 3   | -1 | 1 | 23 | 165 | 187 | GGAGGGAGAG<br>GAAGAAGAUG<br>GGC | :.....<br>:.....<br>: | GUCCGUCUUC<br>UUCCUUUCUU<br>UCG | Clea<br>vage | unclassified<br>cDNA retrotranspo<br>son protein,<br>putative,<br>unclassified,<br>expressed    | 1 |
| GGAGGGAGA<br>GGAAGAAGAT<br>GGGC | LOC_Os<br>04g3589<br>0.1 | 2   | -1 | 1 | 23 | 11  | 33  | GGAGGGAGAG<br>GAAGAAGAUG<br>GGC | .....<br>: :<br>:     | CUCCAUCUUC<br>UUCCUCCUCC<br>UCC | Clea<br>vage | cDNA TKL_IRAK<br>_CR4L.3 - The<br>CR4L subfamily<br>has homology with<br>Crinkly4,<br>expressed | 1 |
| GGAGGGAGA<br>GGAAGAAGAT<br>GGGC | LOC_Os<br>04g3807<br>0.1 | 2.5 | -1 | 1 | 23 | 165 | 187 | GGAGGGAGAG<br>GAAGAAGAUG<br>GGC | :.....<br>:.....<br>: | GUCCGUCUUC<br>UUCCUCUCUU<br>UCG | Clea<br>vage | cDNA retrotranspo<br>son protein,<br>putative,<br>unclassified,<br>expressed                    | 1 |
| GGAGGGAGA<br>GGAAGAAGAT<br>GGGC | LOC_Os<br>04g4393<br>0.1 | 2.5 | -1 | 1 | 23 | 165 | 187 | GGAGGGAGAG<br>GAAGAAGAUG<br>GGC | :.....<br>:.....<br>: | GUCCGUCUUC<br>UUCCUCUCUU<br>UCG | Clea<br>vage | cDNA retrotranspo<br>son protein,<br>putative,<br>unclassified                                  | 1 |
| GGAGGGAGA<br>GGAAGAAGAT<br>GGGC | LOC_Os<br>04g4808<br>0.1 | 2.5 | -1 | 1 | 23 | 165 | 187 | GGAGGGAGAG<br>GAAGAAGAUG<br>GGC | :.....<br>:.....<br>: | GUCCGUCUUC<br>UUCCUCUCUU<br>UCG | Clea<br>vage | cDNA retrotranspo<br>son protein,<br>putative,<br>unclassified,<br>expressed                    | 1 |

|                                 |                          |     |    |   |    |     |     |                                 |             |                                 |              |                                                                              |   |
|---------------------------------|--------------------------|-----|----|---|----|-----|-----|---------------------------------|-------------|---------------------------------|--------------|------------------------------------------------------------------------------|---|
| GGAGGGAGA<br>GGAAGAAGAT<br>GGGC | LOC_Os<br>04g4839<br>0.1 | 1.5 | -1 | 1 | 23 | 29  | 51  | GGAGGGAGAG<br>GAAGAAGAUG<br>GGC | :<br>:<br>: | GGAGGGAGAG<br>GAAGAAGAUG<br>GGC | Clea<br>vage | cDNA uncharacter<br>ized membrane<br>protein, putative,<br>expressed         | 1 |
| GGAGGGAGA<br>GGAAGAAGAT<br>GGGC | LOC_Os<br>04g5120<br>0.1 | 3   | -1 | 1 | 23 | 165 | 187 | GGAGGGAGAG<br>GAAGAAGAUG<br>GGC | :<br>:<br>: | GUCCAUCUUC<br>UUCCUCCCCU<br>UCG | Clea<br>vage | cDNA retrotranspo<br>son protein,<br>putative,<br>unclassified,<br>expressed | 1 |
| GGAGGGAGA<br>GGAAGAAGAT<br>GGGC | LOC_Os<br>04g5427<br>0.1 | 3   | -1 | 1 | 23 | 165 | 187 | GGAGGGAGAG<br>GAAGAAGAUG<br>GGC | :<br>:<br>: | GUCCAUCUUC<br>UUCCUCCCCU<br>UCG | Clea<br>vage | cDNA transposon<br>protein, putative,<br>unclassified,<br>expressed          | 1 |
| GGAGGGAGA<br>GGAAGAAGAT<br>GGGC | LOC_Os<br>04g5469<br>0.1 | 3   | -1 | 1 | 23 | 165 | 187 | GGAGGGAGAG<br>GAAGAAGAUG<br>GGC | :<br>:<br>: | GUCCAUCUUC<br>UUCCUCCCCU<br>UCG | Clea<br>vage | cDNA retrotranspo<br>son protein,<br>putative,<br>unclassified,<br>expressed | 1 |
| GGAGGGAGA<br>GGAAGAAGAT<br>GGGC | LOC_Os<br>04g5587<br>0.1 | 3   | -1 | 1 | 23 | 165 | 187 | GGAGGGAGAG<br>GAAGAAGAUG<br>GGC | :<br>:<br>: | GUCCAUCUUC<br>UUCCUCCCCU<br>UCG | Clea<br>vage | cDNA transposon<br>protein, putative,<br>unclassified,<br>expressed          | 1 |
| GGAGGGAGA<br>GGAAGAAGAT<br>GGGC | LOC_Os<br>04g5653<br>0.1 | 1.5 | -1 | 1 | 23 | 73  | 95  | GGAGGGAGAG<br>GAAGAAGAUG<br>GGC | :<br>:<br>: | CUCCGUCUUC<br>UUCUUCUUC<br>UCC  | Clea<br>vage | cDNA STE_MEK<br>K_ste11_MAP3K.<br>1 - STE kinases<br>include homologs        | 1 |

|                                 |                          |     |    |   |    |     |     |                                 |                       |                                 |              |                                                                                          |                                                                        |  |
|---------------------------------|--------------------------|-----|----|---|----|-----|-----|---------------------------------|-----------------------|---------------------------------|--------------|------------------------------------------------------------------------------------------|------------------------------------------------------------------------|--|
|                                 |                          |     |    |   |    |     |     |                                 |                       |                                 |              |                                                                                          | to sterile 7, sterile<br>11 and sterile 20<br>from yeast,<br>expressed |  |
| GGAGGGAGA<br>GGAAGAAGAT<br>GGGC | LOC_Os<br>04g5755<br>0.1 | 1.5 | -1 | 1 | 23 | 394 | 416 | GGAGGGAGAG<br>GAAGAAGAUG<br>GGC | :.....<br>:.....<br>: | GUUCAUCUUC<br>UUCUUCUUCU<br>UCC | Clea<br>vage | cDNA amine<br>oxidase, flavin-<br>containing, domain<br>containing protein,<br>expressed | 1                                                                      |  |
| GGAGGGAGA<br>GGAAGAAGAT<br>GGGC | LOC_Os<br>05g0403<br>0.1 | 2.5 | -1 | 1 | 23 | 165 | 187 | GGAGGGAGAG<br>GAAGAAGAUG<br>GGC | :.....<br>:.....      | GUCCGUCUUC<br>UUCCUUUCCU<br>UCG | Clea<br>vage | cDNA retrotranspo<br>son protein,<br>putative,<br>unclassified,<br>expressed             | 1                                                                      |  |
| GGAGGGAGA<br>GGAAGAAGAT<br>GGGC | LOC_Os<br>05g0429<br>0.1 | 2.5 | -1 | 1 | 23 | 165 | 187 | GGAGGGAGAG<br>GAAGAAGAUG<br>GGC | :.....<br>:.....      | GUCCGUCUUC<br>UUCCUCUCUU<br>UCG | Clea<br>vage | cDNA retrotranspo<br>son protein,<br>putative,<br>unclassified,<br>expressed             | 1                                                                      |  |
| GGAGGGAGA<br>GGAAGAAGAT<br>GGGC | LOC_Os<br>05g0686<br>0.1 | 3   | -1 | 1 | 23 | 165 | 187 | GGAGGGAGAG<br>GAAGAAGAUG<br>GGC | :.....<br>:.....      | GUCCAUCUUC<br>UUCCUCCCCU<br>UCG | Clea<br>vage | cDNA transposon<br>protein, putative,<br>unclassified,<br>expressed                      | 1                                                                      |  |
| GGAGGGAGA<br>GGAAGAAGAT<br>GGGC | LOC_Os<br>05g1026<br>0.1 | 2.5 | -1 | 1 | 23 | 165 | 187 | GGAGGGAGAG<br>GAAGAAGAUG<br>GGC | :.....<br>:.....      | GUCCGUCUUC<br>UUCCUCUCUU<br>UCG | Clea<br>vage | cDNA retrotranspo<br>son protein,<br>putative,                                           | 1                                                                      |  |



|            |         |     |    |   |    |     |     |            |        |            |      |                    |          |
|------------|---------|-----|----|---|----|-----|-----|------------|--------|------------|------|--------------------|----------|
| GGAGGGAGA  | LOC_Os  | 3   | -1 | 1 | 23 | 165 | 187 | GGAGGGAGAG | :..... | GUCCAUCUUC | Clea | unclassified,      |          |
| GGAAGAAGAT | 05g1435 |     |    |   |    |     |     | GAAGAAGAUG | :... : | UUCCUCCCCU | vage | expressed          |          |
| GGGC       | 0.1     |     |    |   |    |     |     | GGC        |        | UCG        |      | cDNA retrotranspo  | 1        |
|            |         |     |    |   |    |     |     |            |        |            |      | son                | protein, |
|            |         |     |    |   |    |     |     |            |        |            |      | putative,          |          |
|            |         |     |    |   |    |     |     |            |        |            |      | unclassified,      |          |
|            |         |     |    |   |    |     |     |            |        |            |      | expressed          |          |
| GGAGGGAGA  | LOC_Os  | 3   | -1 | 1 | 23 | 165 | 187 | GGAGGGAGAG | :..... | GUCCAUCUUC | Clea | cDNA transposon    | 1        |
| GGAAGAAGAT | 05g1613 |     |    |   |    |     |     | GAAGAAGAUG | :... : | UUCCUCCCCU | vage | protein, putative, |          |
| GGGC       | 0.1     |     |    |   |    |     |     | GGC        |        | UCG        |      | unclassified,      |          |
|            |         |     |    |   |    |     |     |            |        |            |      | expressed          |          |
| GGAGGGAGA  | LOC_Os  | 3   | -1 | 1 | 23 | 165 | 187 | GGAGGGAGAG | :..... | GUCCAUCUUC | Clea | cDNA transposon    | 1        |
| GGAAGAAGAT | 05g1916 |     |    |   |    |     |     | GAAGAAGAUG | :... : | UUCCUCCCCU | vage | protein, putative, |          |
| GGGC       | 0.1     |     |    |   |    |     |     | GGC        |        | UCG        |      | unclassified,      |          |
|            |         |     |    |   |    |     |     |            |        |            |      | expressed          |          |
| GGAGGGAGA  | LOC_Os  | 3   | -1 | 1 | 23 | 165 | 187 | GGAGGGAGAG | :..... | GUCCAUCUUC | Clea | cDNA transposon    | 1        |
| GGAAGAAGAT | 05g2039 |     |    |   |    |     |     | GAAGAAGAUG | :... : | UUCCUCCCCU | vage | protein, putative, |          |
| GGGC       | 0.1     |     |    |   |    |     |     | GGC        |        | UCG        |      | unclassified,      |          |
|            |         |     |    |   |    |     |     |            |        |            |      | expressed          |          |
| GGAGGGAGA  | LOC_Os  | 2.5 | -1 | 1 | 23 | 165 | 187 | GGAGGGAGAG | :..... | GUCCGUCUUC | Clea | cDNA retrotranspo  | 1        |
| GGAAGAAGAT | 05g2111 |     |    |   |    |     |     | GAAGAAGAUG | :..... | UUCCUCUCUU | vage | son                | protein, |
| GGGC       | 0.1     |     |    |   |    |     |     | GGC        |        | UCG        |      | putative,          |          |
|            |         |     |    |   |    |     |     |            |        |            |      | unclassified,      |          |
|            |         |     |    |   |    |     |     |            |        |            |      | expressed          |          |
| GGAGGGAGA  | LOC_Os  | 3   | -1 | 1 | 23 | 165 | 187 | GGAGGGAGAG | :..... | GUCCAUCUUC | Clea | cDNA transposon    | 1        |
| GGAAGAAGAT | 05g2336 |     |    |   |    |     |     | GAAGAAGAUG | :... : | UUCCUCCCCU | vage | protein, putative, |          |

|            |         |     |    |   |    |     |     |            |          |            |      |                                         |   |
|------------|---------|-----|----|---|----|-----|-----|------------|----------|------------|------|-----------------------------------------|---|
| GGGC       | 0.1     |     |    |   |    |     |     | GGC        |          | UCG        |      | unclassified                            |   |
| GGAGGGAGA  | LOC_Os  | 2.5 | -1 | 1 | 23 | 165 | 187 | GGAGGGAGAG | :::~::~: | GUCCGUCUUC | Clea | cDNA retrotranspo                       | 1 |
| GGAAGAAGAT | 05g2659 |     |    |   |    |     |     | GAAGAAGAUG | :::~::~: | UUCCUCUCUU | vage | son protein,                            |   |
| GGGC       | 0.1     |     |    |   |    |     |     | GGC        |          | UCG        |      | putative,<br>unclassified,<br>expressed |   |
| GGAGGGAGA  | LOC_Os  | 2.5 | -1 | 1 | 23 | 165 | 187 | GGAGGGAGAG | :::~::~: | GUCCGUCUUC | Clea | cDNA retrotranspo                       | 1 |
| GGAAGAAGAT | 05g2891 |     |    |   |    |     |     | GAAGAAGAUG | :::~::~: | UUCCUCUCUU | vage | son protein,                            |   |
| GGGC       | 0.1     |     |    |   |    |     |     | GGC        |          | UCG        |      | putative,<br>unclassified,<br>expressed |   |
| GGAGGGAGA  | LOC_Os  | 2.5 | -1 | 1 | 23 | 165 | 187 | GGAGGGAGAG | :::~::~: | GUCCGUCUUC | Clea | cDNA retrotranspo                       | 1 |
| GGAAGAAGAT | 05g3055 |     |    |   |    |     |     | GAAGAAGAUG | :::~::~: | UUCCUCUCUU | vage | son protein,                            |   |
| GGGC       | 0.1     |     |    |   |    |     |     | GGC        |          | UCG        |      | putative,<br>unclassified,<br>expressed |   |
| GGAGGGAGA  | LOC_Os  | 2   | -1 | 1 | 23 | 115 | 137 | GGAGGGAGAG | :::~::~: | CCUCAUCUUC | Clea | cDNA E3                                 | 1 |
| GGAAGAAGAT | 05g3300 |     |    |   |    |     |     | GAAGAAGAUG | :::~::~: | UUCUUCUUC  | vage | ubiquitin-protein                       |   |
| GGGC       | 0.2     |     |    |   |    |     |     | GGC        | :        | UCG        |      | ligase MGRN1,<br>putative, expressed    |   |
| GGAGGGAGA  | LOC_Os  | 1   | -1 | 1 | 23 | 237 | 259 | GGAGGGAGAG | :::~::~: | CAUCAUCUUC | Clea | cDNA glycosyl                           | 1 |
| GGAAGAAGAT | 05g3520 |     |    |   |    |     |     | GAAGAAGAUG | :::~::~: | UUCUUCUUC  | vage | transferase,                            |   |
| GGGC       | 0.2     |     |    |   |    |     |     | GGC        | :::      | UCC        |      | putative, expressed                     |   |
| GGAGGGAGA  | LOC_Os  | 3   | -1 | 1 | 23 | 165 | 187 | GGAGGGAGAG | :::~::~: | GUCCGUCUUC | Clea | cDNA retrotranspo                       | 1 |
| GGAAGAAGAT | 05g3758 |     |    |   |    |     |     | GAAGAAGAUG | :::~::~: | UUCCUUUCUU | vage | son protein,                            |   |
| GGGC       | 0.1     |     |    |   |    |     |     | GGC        |          | UCG        |      | putative,                               |   |

|                                 |                          |     |    |   |    |     |     |                                 |                       |                                 |                     |                                                                                                            |   |
|---------------------------------|--------------------------|-----|----|---|----|-----|-----|---------------------------------|-----------------------|---------------------------------|---------------------|------------------------------------------------------------------------------------------------------------|---|
| GGAGGGAGA<br>GGAAGAAGAT<br>GGGC | LOC_Os<br>05g4169<br>0.1 | 2.5 | -1 | 1 | 23 | 165 | 187 | GGAGGGAGAG<br>GAAGAAGAUG<br>GGC | :.....<br>:.....<br>: | GUCCGUCUUC<br>UUCCUCUCUU<br>UCG | Clea<br>vage        | unclassified,<br>expressed<br>cDNA retrotranspo<br>son protein,<br>putative,<br>unclassified,<br>expressed | 1 |
| GGAGGGAGA<br>GGAAGAAGAT<br>GGGC | LOC_Os<br>05g4295<br>0.1 | 3   | -1 | 1 | 23 | 165 | 187 | GGAGGGAGAG<br>GAAGAAGAUG<br>GGC | :.....<br>: : :<br>:  | GUCCAUCUUC<br>UUCCUCCCCU<br>UCG | Clea<br>vage        | cDNA retrotranspo<br>son protein,<br>putative,<br>unclassified                                             | 1 |
| GGAGGGAGA<br>GGAAGAAGAT<br>GGGC | LOC_Os<br>05g4579<br>0.1 | 3   | -1 | 1 | 23 | 165 | 187 | GGAGGGAGAG<br>GAAGAAGAUG<br>GGC | :.....<br>: : :<br>:  | GUCCAUCUUC<br>UUCCUCCCCU<br>UCG | Clea<br>vage        | cDNA retrotranspo<br>son protein,<br>putative,<br>unclassified,<br>expressed                               | 1 |
| GGAGGGAGA<br>GGAAGAAGAT<br>GGGC | LOC_Os<br>05g5138<br>0.1 | 2.5 | -1 | 1 | 23 | 560 | 582 | GGAGGGAGAG<br>GAAGAAGAUG<br>GGC | :.....<br>: : :<br>:. | CCCCAUUUUC<br>UUGCUCUCCC<br>UCU | Tran<br>slati<br>on | cDNA expressed<br>protein                                                                                  | 1 |
| GGAGGGAGA<br>GGAAGAAGAT<br>GGGC | LOC_Os<br>05g5138<br>0.2 | 2.5 | -1 | 1 | 23 | 420 | 442 | GGAGGGAGAG<br>GAAGAAGAUG<br>GGC | :.....<br>: : :<br>:. | CCCCAUUUUC<br>UUGCUCUCCC<br>UCU | Tran<br>slati<br>on | cDNA expressed<br>protein                                                                                  | 1 |
| GGAGGGAGA<br>GGAAGAAGAT<br>GGGC | LOC_Os<br>06g1592<br>0.1 | 3   | -1 | 1 | 23 | 165 | 187 | GGAGGGAGAG<br>GAAGAAGAUG<br>GGC | :.....<br>: : :<br>:  | GUCCAUCUUC<br>UUCCUCCCCU<br>UCG | Clea<br>vage        | cDNA transposon<br>protein, putative,<br>unclassified,<br>expressed                                        | 1 |

|                                 |                          |     |    |   |    |     |     |                                 |                     |                                 |              |                                                                                     |   |
|---------------------------------|--------------------------|-----|----|---|----|-----|-----|---------------------------------|---------------------|---------------------------------|--------------|-------------------------------------------------------------------------------------|---|
| GGAGGGAGA<br>GGAAGAAGAT<br>GGGC | LOC_Os<br>06g1622<br>0.1 | 3   | -1 | 1 | 23 | 165 | 187 | GGAGGGAGAG<br>GAAGAAGAUG<br>GGC | :.....<br>:::: :::: | GUCCAUCUUC<br>UUCCUCCCCU<br>UCG | Clea<br>vage | cDNA transposon<br>protein, putative,<br>unclassified,<br>expressed                 | 1 |
| GGAGGGAGA<br>GGAAGAAGAT<br>GGGC | LOC_Os<br>06g1721<br>0.1 | 3   | -1 | 1 | 23 | 165 | 187 | GGAGGGAGAG<br>GAAGAAGAUG<br>GGC | :.....<br>:::: :::: | GUCCAUCUUC<br>UUCCUCCCCU<br>UCG | Clea<br>vage | cDNA transposon<br>protein, putative,<br>unclassified,<br>expressed                 | 1 |
| GGAGGGAGA<br>GGAAGAAGAT<br>GGGC | LOC_Os<br>06g2016<br>0.1 | 2   | -1 | 1 | 23 | 165 | 187 | GGAGGGAGAG<br>GAAGAAGAUG<br>GGC | :.....<br>:.....    | GUCCAUCUUC<br>UUCCUCUCUU<br>UCG | Clea<br>vage | cDNA retrotranspo<br>son protein,<br>putative, Ty3-<br>gypsy subclass,<br>expressed | 1 |
| GGAGGGAGA<br>GGAAGAAGAT<br>GGGC | LOC_Os<br>06g2382<br>0.1 | 2.5 | -1 | 1 | 23 | 165 | 187 | GGAGGGAGAG<br>GAAGAAGAUG<br>GGC | :.....<br>:.....    | GUCCGUCUUC<br>UUCCUCUCUU<br>UCG | Clea<br>vage | cDNA retrotranspo<br>son protein,<br>putative,<br>unclassified,<br>expressed        | 1 |
| GGAGGGAGA<br>GGAAGAAGAT<br>GGGC | LOC_Os<br>06g3705<br>0.1 | 3   | -1 | 1 | 23 | 165 | 187 | GGAGGGAGAG<br>GAAGAAGAUG<br>GGC | :.....<br>:::: :::: | GUCCAUCUUC<br>UUCCUCCCCU<br>UCG | Clea<br>vage | cDNA transposon<br>protein, putative,<br>unclassified,<br>expressed                 | 1 |
| GGAGGGAGA<br>GGAAGAAGAT<br>GGGC | LOC_Os<br>06g3709<br>0.1 | 3   | -1 | 1 | 23 | 165 | 187 | GGAGGGAGAG<br>GAAGAAGAUG<br>GGC | :.....<br>:::: :::: | GUCCAUCUUC<br>UUCCUCCCCU<br>UCG | Clea<br>vage | cDNA transposon<br>protein, putative,<br>unclassified,<br>expressed                 | 1 |

|                                 |                          |     |    |   |    |     |     |                                 |                      |                                |              |                                                                              |   |
|---------------------------------|--------------------------|-----|----|---|----|-----|-----|---------------------------------|----------------------|--------------------------------|--------------|------------------------------------------------------------------------------|---|
| GGAGGGAGA<br>GGAAGAAGAT<br>GGGC | LOC_Os<br>06g3861<br>2.1 | 3   | -1 | 1 | 23 | 165 | 187 | GGAGGGAGAG<br>GAAGAAGAUG<br>GGC | :.....<br>: : :<br>: | GUCCAUCUUC<br>UCCUCCCCU<br>UCG | Clea<br>vage | cDNA retrotranspo<br>son protein,<br>putative,<br>unclassified,<br>expressed | 1 |
| GGAGGGAGA<br>GGAAGAAGAT<br>GGGC | LOC_Os<br>06g3862<br>0.1 | 3   | -1 | 1 | 23 | 165 | 187 | GGAGGGAGAG<br>GAAGAAGAUG<br>GGC | :.....<br>: : :<br>: | GUCCAUCUUC<br>UCCUCCCCU<br>UCG | Clea<br>vage | cDNA retrotranspo<br>son protein,<br>putative,<br>unclassified,<br>expressed | 1 |
| GGAGGGAGA<br>GGAAGAAGAT<br>GGGC | LOC_Os<br>06g3917<br>0.1 | 2.5 | -1 | 1 | 23 | 165 | 187 | GGAGGGAGAG<br>GAAGAAGAUG<br>GGC | :.....<br>: : :<br>: | GUCCGUCUUC<br>UCCUCUCUU<br>UCG | Clea<br>vage | cDNA retrotranspo<br>son protein,<br>putative,<br>unclassified,<br>expressed | 1 |
| GGAGGGAGA<br>GGAAGAAGAT<br>GGGC | LOC_Os<br>06g3994<br>0.1 | 3   | -1 | 1 | 23 | 165 | 187 | GGAGGGAGAG<br>GAAGAAGAUG<br>GGC | :.....<br>: : :<br>: | GUCCAUCUUC<br>UCCUCCCCU<br>UCG | Clea<br>vage | cDNA transposon<br>protein, putative,<br>unclassified,<br>expressed          | 1 |
| GGAGGGAGA<br>GGAAGAAGAT<br>GGGC | LOC_Os<br>06g4260<br>0.1 | 2.5 | -1 | 1 | 23 | 165 | 187 | GGAGGGAGAG<br>GAAGAAGAUG<br>GGC | :.....<br>: : :<br>: | GUCCGUCUUC<br>UCCUCUCUU<br>UCG | Clea<br>vage | cDNA retrotranspo<br>son protein,<br>putative,<br>unclassified,<br>expressed | 1 |
| GGAGGGAGA<br>GGAAGAAGAT         | LOC_Os<br>06g4911        | 2   | -1 | 1 | 23 | 21  | 43  | GGAGGGAGAG<br>GAAGAAGAUG        | :.....<br>: : :<br>: | UCUCAUCUUC<br>UUCUUCUUCU       | Clea<br>vage | cDNA delta-<br>aminolevulinic                                                | 1 |

|            |         |     |    |   |    |     |     |            |             |            |      |                                                                       |   |
|------------|---------|-----|----|---|----|-----|-----|------------|-------------|------------|------|-----------------------------------------------------------------------|---|
| GGGC       | 0.2     |     |    |   |    |     |     | GGC        | ::          | UCU        |      | acid dehydratase,<br>chloroplast<br>precursor, putative,<br>expressed |   |
| GGAGGGAGA  | LOC_Os  | 2   | -1 | 1 | 23 | 5   | 27  | GGAGGGAGAG | :.....:     | UCUCAUCUUC | Clea | cDNA delta-                                                           | 1 |
| GGAAGAAGAT | 06g4911 |     |    |   |    |     |     | GAAGAAGAUG | :.....:     | UUCUUCUUCU | vage | aminolevulinic                                                        |   |
| GGGC       | 0.3     |     |    |   |    |     |     | GGC        | ::          | UCU        |      | acid dehydratase,<br>chloroplast<br>precursor, putative,<br>expressed |   |
| GGAGGGAGA  | LOC_Os  | 3   | -1 | 1 | 23 | 165 | 187 | GGAGGGAGAG | :.....:     | GUCCAUCUUC | Clea | cDNA transposon                                                       | 1 |
| GGAAGAAGAT | 06g5080 |     |    |   |    |     |     | GAAGAAGAUG | :...: ...:  | UUCCUCCCCU | vage | protein, putative,<br>unclassified,<br>expressed                      |   |
| GGGC       | 0.1     |     |    |   |    |     |     | GGC        |             | UCG        |      |                                                                       |   |
| GGAGGGAGA  | LOC_Os  | 3   | -1 | 1 | 23 | 165 | 187 | GGAGGGAGAG | :.....:     | GUCCAUCUUC | Clea | cDNA transposon                                                       | 1 |
| GGAAGAAGAT | 07g0165 |     |    |   |    |     |     | GAAGAAGAUG | :...: ...:  | UUCCUCCCCU | vage | protein, putative,<br>unclassified,<br>expressed                      |   |
| GGGC       | 0.1     |     |    |   |    |     |     | GGC        |             | UCG        |      |                                                                       |   |
| GGAGGGAGA  | LOC_Os  | 2.5 | -1 | 1 | 23 | 165 | 187 | GGAGGGAGAG | :.....:     | GUCCGUCUUC | Clea | cDNA retrotranspo                                                     | 1 |
| GGAAGAAGAT | 07g0923 |     |    |   |    |     |     | GAAGAAGAUG | :.....:     | UUCCUCUCUU | vage | son protein,<br>putative,<br>unclassified,<br>expressed               |   |
| GGGC       | 0.1     |     |    |   |    |     |     | GGC        |             | UCG        |      |                                                                       |   |
| GGAGGGAGA  | LOC_Os  | 2   | -1 | 1 | 23 | 53  | 75  | GGAGGGAGAG | :...: ..... | GCUCCUCUUC | Clea | cDNA galactosyltr                                                     | 1 |
| GGAAGAAGAT | 07g0969 |     |    |   |    |     |     | GAAGAAGAUG | :.....:     | UUCCUCUUCU | vage | ansferase family                                                      |   |
| GGGC       | 0.1     |     |    |   |    |     |     | GGC        | :           | UCC        |      | protein, putative,                                                    |   |

|                                 |                          |     |    |   |    |     |     |                                 |                       |                                 |              |                                                                                           |   |
|---------------------------------|--------------------------|-----|----|---|----|-----|-----|---------------------------------|-----------------------|---------------------------------|--------------|-------------------------------------------------------------------------------------------|---|
| GGAGGGAGA<br>GGAAGAAGAT<br>GGGC | LOC_Os<br>07g2854<br>0.1 | 2.5 | -1 | 1 | 23 | 165 | 187 | GGAGGGAGAG<br>GAAGAAGAUG<br>GGC | :.....<br>:.....<br>: | GUCCGUCUUC<br>UUCCUCUCUU<br>UCG | Clea<br>vage | expressed<br>cDNA retrotranspo<br>son protein,<br>putative,<br>unclassified,<br>expressed | 1 |
| GGAGGGAGA<br>GGAAGAAGAT<br>GGGC | LOC_Os<br>07g3089<br>0.1 | 3   | -1 | 1 | 23 | 165 | 187 | GGAGGGAGAG<br>GAAGAAGAUG<br>GGC | :.....<br>: : :<br>:  | GUCCAUCUUC<br>UUCCUCCCCU<br>UCG | Clea<br>vage | cDNA transposon<br>protein, putative,<br>unclassified,<br>expressed                       | 1 |
| GGAGGGAGA<br>GGAAGAAGAT<br>GGGC | LOC_Os<br>07g3226<br>0.1 | 2.5 | -1 | 1 | 23 | 165 | 187 | GGAGGGAGAG<br>GAAGAAGAUG<br>GGC | :.....<br>:.....<br>: | GUCCGUCUUC<br>UUCCUCUCUU<br>UCG | Clea<br>vage | cDNA retrotranspo<br>son protein,<br>putative,<br>unclassified,<br>expressed              | 1 |
| GGAGGGAGA<br>GGAAGAAGAT<br>GGGC | LOC_Os<br>07g3232<br>0.1 | 2.5 | -1 | 1 | 23 | 165 | 187 | GGAGGGAGAG<br>GAAGAAGAUG<br>GGC | :.....<br>:.....<br>: | GUCCGUCUUC<br>UUCCUCUCUU<br>UCG | Clea<br>vage | cDNA retrotranspo<br>son protein,<br>putative,<br>unclassified,<br>expressed              | 1 |
| GGAGGGAGA<br>GGAAGAAGAT<br>GGGC | LOC_Os<br>07g3666<br>0.1 | 2.5 | -1 | 1 | 23 | 165 | 187 | GGAGGGAGAG<br>GAAGAAGAUG<br>GGC | :.....<br>:.....<br>: | GUCCGUCUUC<br>UUCCUCUCUU<br>UCG | Clea<br>vage | cDNA retrotranspo<br>son protein,<br>putative,<br>unclassified,<br>expressed              | 1 |
| GGAGGGAGA                       | LOC_Os                   | 3   | -1 | 1 | 23 | 165 | 187 | GGAGGGAGAG                      | :.....                | GUCCAUCUUC                      | Clea         | cDNA transposon                                                                           | 1 |

|                                 |                          |     |    |   |    |      |     |                                 |                      |                                 |              |                                                                                    |   |
|---------------------------------|--------------------------|-----|----|---|----|------|-----|---------------------------------|----------------------|---------------------------------|--------------|------------------------------------------------------------------------------------|---|
| GGAAGAAGAT<br>GGGC              | 07g3719<br>0.1           |     |    |   |    |      |     | GAAGAAGAUG<br>GGC               | :::: ::::            | UUCCUCCCCU<br>UCG               | vage         | protein, putative,<br>unclassified,<br>expressed                                   |   |
| GGAGGGAGA<br>GGAAGAAGAT<br>GGGC | LOC_Os<br>07g4187<br>0.1 | 3   | -1 | 1 | 23 | 165  | 187 | GGAGGGAGAG<br>GAAGAAGAUG<br>GGC | : ::::: ::::         | GUCCAUCUUC<br>UUCCUCCCCU<br>UCG | Clea<br>vage | cDNA retrotranspo<br>son protein,<br>putative,<br>unclassified                     | 1 |
| GGAGGGAGA<br>GGAAGAAGAT<br>GGGC | LOC_Os<br>07g4205<br>0.1 | 3   | -1 | 1 | 23 | 165  | 187 | GGAGGGAGAG<br>GAAGAAGAUG<br>GGC | : ::::: ::::         | GUCCAUCUUC<br>UUCCUCCCCU<br>UCG | Clea<br>vage | cDNA retrotranspo<br>son protein,<br>putative,<br>unclassified,<br>expressed       | 1 |
| GGAGGGAGA<br>GGAAGAAGAT<br>GGGC | LOC_Os<br>08g0139<br>0.1 | 2   | -1 | 1 | 23 | 182  | 204 | GGAGGGAGAG<br>GAAGAAGAUG<br>GGC | : ::::: ::::<br>:.   | UCCUAUCUUC<br>UUCUUCUUCU<br>UCU | Clea<br>vage | cDNA phosphatidy<br>linositol-4-<br>phosphate 5-<br>Kinase, putative,<br>expressed | 1 |
| GGAGGGAGA<br>GGAAGAAGAT<br>GGGC | LOC_Os<br>08g0152<br>0.1 | 1.5 | -1 | 1 | 23 | 51   | 73  | GGAGGGAGAG<br>GAAGAAGAUG<br>GGC | : ::::: ::::<br>: :: | AACCGUCUUC<br>UUCUUCUUC<br>UCC  | Clea<br>vage | cDNA cytochrome<br>P450, putative,<br>expressed                                    | 1 |
| GGAGGGAGA<br>GGAAGAAGAT<br>GGGC | LOC_Os<br>08g0658<br>0.1 | 2.5 | -1 | 1 | 23 | 165  | 187 | GGAGGGAGAG<br>GAAGAAGAUG<br>GGC | : ::::: ::::         | GUCCGUCUUC<br>UUCCUCUCUU<br>UCG | Clea<br>vage | cDNA retrotranspo<br>son protein,<br>putative,<br>unclassified,<br>expressed       | 1 |
| GGAGGGAGA                       | LOC_Os                   | 2.5 | -1 | 1 | 23 | 1907 | 192 | GGAGGGAGAG                      | : ::::: ::::         | GCUCAUCUUC                      | Clea         | cDNA ABC-2 type                                                                    | 2 |



|                                 |                          |     |    |   |    |     |     |                                 |                          |                                 |              |                                                                              |   |
|---------------------------------|--------------------------|-----|----|---|----|-----|-----|---------------------------------|--------------------------|---------------------------------|--------------|------------------------------------------------------------------------------|---|
| GGAAGAAGAT<br>GGGC              | 08g0701<br>0.1           |     |    |   |    | 9   |     | GAAGAAGAUG<br>GGC               | ::: ::<br>.              | UUCUUCUCCG<br>UCU               | vage         | transporter domain<br>containing protein,<br>expressed                       |   |
| GGAGGGAGA<br>GGAAGAAGAT<br>GGGC | LOC_Os<br>08g0701<br>0.1 | 3   | -1 | 1 | 23 | 412 | 434 | GGAGGGAGAG<br>GAAGAAGAUG<br>GGC | .. :::<br>::: :::<br>..  | CUUCUUCUUC<br>UUCUUCUUCU<br>UCU | Clea<br>vage | cDNA ABC-2 type<br>transporter domain<br>containing protein,<br>expressed    | 2 |
| GGAGGGAGA<br>GGAAGAAGAT<br>GGGC | LOC_Os<br>08g0714<br>0.1 | 3   | -1 | 1 | 23 | 165 | 187 | GGAGGGAGAG<br>GAAGAAGAUG<br>GGC | ::: :::<br>::: :::<br>:: | GUCCAUCUUC<br>UUCCUCCCCU<br>UCG | Clea<br>vage | cDNA transposon<br>protein, putative,<br>unclassified,<br>expressed          | 1 |
| GGAGGGAGA<br>GGAAGAAGAT<br>GGGC | LOC_Os<br>08g0741<br>0.1 | 3   | -1 | 1 | 23 | 165 | 187 | GGAGGGAGAG<br>GAAGAAGAUG<br>GGC | ::: :::<br>::: :::<br>:: | GUCCAUCUUC<br>UUCCUCCCCU<br>UCG | Clea<br>vage | cDNA retrotranspo<br>son protein,<br>putative,<br>unclassified,<br>expressed | 1 |
| GGAGGGAGA<br>GGAAGAAGAT<br>GGGC | LOC_Os<br>08g0949<br>0.1 | 2.5 | -1 | 1 | 23 | 193 | 215 | GGAGGGAGAG<br>GAAGAAGAUG<br>GGC | ::: :::<br>::: :::<br>:: | GUCCGUCUUC<br>UUCCUCUCUU<br>UCG | Clea<br>vage | cDNA retrotranspo<br>son protein,<br>putative,<br>unclassified               | 1 |
| GGAGGGAGA<br>GGAAGAAGAT<br>GGGC | LOC_Os<br>08g1448<br>0.1 | 3   | -1 | 1 | 23 | 165 | 187 | GGAGGGAGAG<br>GAAGAAGAUG<br>GGC | ::: :::<br>::: :::<br>:: | GUCCAUCUUC<br>UUCCUCCCCU<br>UCG | Clea<br>vage | cDNA transposon<br>protein, putative,<br>unclassified,<br>expressed          | 1 |
| GGAGGGAGA<br>GGAAGAAGAT         | LOC_Os<br>08g1895        | 3   | -1 | 1 | 23 | 165 | 187 | GGAGGGAGAG<br>GAAGAAGAUG        | ::: :::<br>::: :::<br>:: | GUCCAUCUUC<br>UUCCUCCCCU        | Clea<br>vage | cDNA transposon<br>protein, putative,                                        | 1 |

|            |         |     |    |   |    |     |     |            |            |            |      |                                         |   |
|------------|---------|-----|----|---|----|-----|-----|------------|------------|------------|------|-----------------------------------------|---|
| GGGC       | 0.1     |     |    |   |    |     |     | GGC        |            | UCG        |      | unclassified,<br>expressed              |   |
| GGAGGGAGA  | LOC_Os  | 3   | -1 | 1 | 23 | 165 | 187 | GGAGGGAGAG | :.....     | GUCCAUCUUC | Clea | cDNA retrotranspo                       | 1 |
| GGAAGAAGAT | 08g1936 |     |    |   |    |     |     | GAAGAAGAUG | :...: ...: | UUCCUCCCCU | vage | son protein,                            |   |
| GGGC       | 0.1     |     |    |   |    |     |     | GGC        |            | UCG        |      | putative,<br>unclassified,<br>expressed |   |
| GGAGGGAGA  | LOC_Os  | 2.5 | -1 | 1 | 23 | 165 | 187 | GGAGGGAGAG | :.....     | GUCCGUCUUC | Clea | cDNA retrotranspo                       | 1 |
| GGAAGAAGAT | 08g2028 |     |    |   |    |     |     | GAAGAAGAUG | :.....     | UUCCUUUCCU | vage | son protein,                            |   |
| GGGC       | 0.1     |     |    |   |    |     |     | GGC        |            | UCG        |      | putative,<br>unclassified,<br>expressed |   |
| GGAGGGAGA  | LOC_Os  | 3   | -1 | 1 | 23 | 165 | 187 | GGAGGGAGAG | :.....     | GUCCAUCUUC | Clea | cDNA retrotranspo                       | 1 |
| GGAAGAAGAT | 08g2123 |     |    |   |    |     |     | GAAGAAGAUG | :...: ...: | UUCCUCCCCU | vage | son protein,                            |   |
| GGGC       | 0.1     |     |    |   |    |     |     | GGC        |            | UCG        |      | putative,<br>unclassified,<br>expressed |   |
| GGAGGGAGA  | LOC_Os  | 3   | -1 | 1 | 23 | 165 | 187 | GGAGGGAGAG | :.....     | GUCCAUCUUC | Clea | cDNA transposon                         | 1 |
| GGAAGAAGAT | 08g2330 |     |    |   |    |     |     | GAAGAAGAUG | :...: ...: | UUCCUCCCCU | vage | protein, putative,                      |   |
| GGGC       | 0.1     |     |    |   |    |     |     | GGC        |            | UCG        |      | unclassified,<br>expressed              |   |
| GGAGGGAGA  | LOC_Os  | 3   | -1 | 1 | 23 | 165 | 187 | GGAGGGAGAG | :.....     | GUCCAUCUUC | Clea | cDNA retrotranspo                       | 1 |
| GGAAGAAGAT | 08g2376 |     |    |   |    |     |     | GAAGAAGAUG | :...: ...: | UUCCUCCCCU | vage | son protein,                            |   |
| GGGC       | 0.1     |     |    |   |    |     |     | GGC        |            | UCG        |      | putative,<br>unclassified,<br>expressed |   |

|            |         |     |    |   |    |      |     |            |            |            |      |                                   |   |
|------------|---------|-----|----|---|----|------|-----|------------|------------|------------|------|-----------------------------------|---|
| GGAGGGAGA  | LOC_Os  | 3   | -1 | 1 | 23 | 165  | 187 | GGAGGGAGAG | :.....:    | GUCCAUCUUC | Clea | cDNA transposon                   | 1 |
| GGAAGAAGAT | 08g2403 |     |    |   |    |      |     | GAAGAAGAUG | :...:..:   | UUCCUCCCCU | vage | protein, putative,                |   |
| GGGC       | 0.1     |     |    |   |    |      |     | GGC        |            | UCG        |      | unclassified                      |   |
| GGAGGGAGA  | LOC_Os  | 3   | -1 | 1 | 23 | 165  | 187 | GGAGGGAGAG | :.....:    | GUCCAUCUUC | Clea | cDNA transposon                   | 1 |
| GGAAGAAGAT | 08g2512 |     |    |   |    |      |     | GAAGAAGAUG | :...:..:   | UUCCUCCCCU | vage | protein, putative,                |   |
| GGGC       | 0.1     |     |    |   |    |      |     | GGC        |            | UCG        |      | unclassified                      |   |
| GGAGGGAGA  | LOC_Os  | 1.5 | -1 | 1 | 23 | 1072 | 109 | GGAGGGAGAG | :.:...:..: | GCUUAUCCUC | Clea | cDNA retrotranspo                 | 1 |
| GGAAGAAGAT | 08g3101 |     |    |   |    |      | 4   | GAAGAAGAUG | :.....:    | UUCCUCUUCC | vage | son protein,                      |   |
| GGGC       | 0.1     |     |    |   |    |      |     | GGC        | :          | UCC        |      | putative, unclassified, expressed |   |
| GGAGGGAGA  | LOC_Os  | 3   | -1 | 1 | 23 | 165  | 187 | GGAGGGAGAG | :.....:    | GUCCAUCUUC | Clea | cDNA retrotranspo                 | 1 |
| GGAAGAAGAT | 08g3277 |     |    |   |    |      |     | GAAGAAGAUG | :...:..:   | UUCCUCCCCU | vage | son protein,                      |   |
| GGGC       | 0.1     |     |    |   |    |      |     | GGC        |            | UCG        |      | putative, unclassified, expressed |   |
| GGAGGGAGA  | LOC_Os  | 2.5 | -1 | 1 | 23 | 165  | 187 | GGAGGGAGAG | :.....:    | GUCCGUCUUC | Clea | cDNA retrotranspo                 | 1 |
| GGAAGAAGAT | 08g3580 |     |    |   |    |      |     | GAAGAAGAUG | :.....:    | UUCCUCUCUU | vage | son protein,                      |   |
| GGGC       | 0.1     |     |    |   |    |      |     | GGC        |            | UCG        |      | putative, unclassified, expressed |   |
| GGAGGGAGA  | LOC_Os  | 2.5 | -1 | 1 | 23 | 165  | 187 | GGAGGGAGAG | :.....:    | GUCCGUCUUC | Clea | cDNA retrotranspo                 | 1 |
| GGAAGAAGAT | 08g3755 |     |    |   |    |      |     | GAAGAAGAUG | :.....:    | UUCCUCUCUU | vage | son protein,                      |   |
| GGGC       | 0.1     |     |    |   |    |      |     | GGC        |            | UCG        |      | putative, unclassified, expressed |   |

|                                 |                          |   |    |   |    |     |     |                                 |                           |                                 |                     |                                                                              |   |
|---------------------------------|--------------------------|---|----|---|----|-----|-----|---------------------------------|---------------------------|---------------------------------|---------------------|------------------------------------------------------------------------------|---|
| GGAGGGAGA<br>GGAAGAAGAT<br>GGGC | LOC_Os<br>08g4098<br>0.1 | 3 | -1 | 1 | 23 | 165 | 187 | GGAGGGAGAG<br>GAAGAAGAUG<br>GGC | :.....<br>:.....<br>:     | GUCCGUCUUC<br>UUUCUCUCUU<br>UCG | Clea<br>vage        | cDNA retrotranspo<br>son protein,<br>putative,<br>unclassified,<br>expressed | 1 |
| GGAGGGAGA<br>GGAAGAAGAT<br>GGGC | LOC_Os<br>08g4264<br>0.1 | 2 | -1 | 1 | 23 | 13  | 35  | GGAGGGAGAG<br>GAAGAAGAUG<br>GGC | .....<br>:: .....<br>.: : | CUCCAUCUUC<br>UUCAUCUCCC<br>UUC | Tran<br>slati<br>on | cDNA zinc finger,<br>C3HC4 type<br>domain containing<br>protein, expressed   | 1 |
| GGAGGGAGA<br>GGAAGAAGAT<br>GGGC | LOC_Os<br>08g4471<br>0.1 | 3 | -1 | 1 | 23 | 165 | 187 | GGAGGGAGAG<br>GAAGAAGAUG<br>GGC | :.....<br>:::: ::::<br>:  | GUCCAUCUUC<br>UUCCUCCCCU<br>UCG | Clea<br>vage        | cDNA retrotranspo<br>son protein,<br>putative,<br>unclassified               | 1 |
| GGAGGGAGA<br>GGAAGAAGAT<br>GGGC | LOC_Os<br>09g1482<br>0.1 | 3 | -1 | 1 | 23 | 165 | 187 | GGAGGGAGAG<br>GAAGAAGAUG<br>GGC | :.....<br>:::: ::::<br>:  | GUCCAUCUUC<br>UUCCUCCCCU<br>UCG | Clea<br>vage        | cDNA retrotranspo<br>son protein,<br>putative,<br>unclassified,<br>expressed | 1 |
| GGAGGGAGA<br>GGAAGAAGAT<br>GGGC | LOC_Os<br>09g1738<br>0.1 | 3 | -1 | 1 | 23 | 165 | 187 | GGAGGGAGAG<br>GAAGAAGAUG<br>GGC | :.....<br>:.....<br>:     | GUCCGUCUUC<br>UUCCUCUCUU<br>UUG | Clea<br>vage        | cDNA retrotranspo<br>son protein,<br>putative,<br>unclassified,<br>expressed | 1 |
| GGAGGGAGA<br>GGAAGAAGAT<br>GGGC | LOC_Os<br>09g1954<br>0.1 | 3 | -1 | 1 | 23 | 165 | 187 | GGAGGGAGAG<br>GAAGAAGAUG<br>GGC | :.....<br>:::: ::::<br>:  | GUCCAUCUUC<br>UUCCUCCCCU<br>UCG | Clea<br>vage        | cDNA transposon<br>protein, putative,<br>unclassified,                       | 1 |

|                                 |                          |   |    |   |    |     |     |                                 |                        |                                 |              |                                                                              |   |
|---------------------------------|--------------------------|---|----|---|----|-----|-----|---------------------------------|------------------------|---------------------------------|--------------|------------------------------------------------------------------------------|---|
| GGAGGGAGA<br>GGAAGAAGAT<br>GGGC | LOC_Os<br>09g2380<br>0.1 | 3 | -1 | 1 | 23 | 165 | 187 | GGAGGGAGAG<br>GAAGAAGAUG<br>GGC | :.....<br>: : :<br>:   | GUCCAUCUUC<br>UUCCUCCCCU<br>UCG | Clea<br>vage | expressed<br>cDNA retrotranspo<br>son protein,<br>putative,<br>unclassified  | 1 |
| GGAGGGAGA<br>GGAAGAAGAT<br>GGGC | LOC_Os<br>09g2476<br>0.1 | 2 | -1 | 1 | 23 | 165 | 187 | GGAGGGAGAG<br>GAAGAAGAUG<br>GGC | :.....<br>:.....<br>:  | GUCCAUCUUC<br>UUCCUCUCUU<br>UCG | Clea<br>vage | cDNA retrotranspo<br>son protein,<br>putative,<br>unclassified,<br>expressed | 1 |
| GGAGGGAGA<br>GGAAGAAGAT<br>GGGC | LOC_Os<br>09g2511<br>0.1 | 3 | -1 | 1 | 23 | 165 | 187 | GGAGGGAGAG<br>GAAGAAGAUG<br>GGC | :.....<br>: : :<br>:   | GUCCAUCUUC<br>UUCCUCCCCU<br>UCG | Clea<br>vage | cDNA transposon<br>protein, putative,<br>unclassified                        | 1 |
| GGAGGGAGA<br>GGAAGAAGAT<br>GGGC | LOC_Os<br>09g2726<br>0.1 | 2 | -1 | 1 | 23 | 50  | 72  | GGAGGGAGAG<br>GAAGAAGAUG<br>GGC | :.....<br>:.....<br>:: | CCUCGUCUUC<br>UUCUUCUUCU<br>UCC | Clea<br>vage | cDNA plant viral<br>response family<br>protein, putative,<br>expressed       | 1 |
| GGAGGGAGA<br>GGAAGAAGAT<br>GGGC | LOC_Os<br>10g0891<br>0.1 | 3 | -1 | 1 | 23 | 165 | 187 | GGAGGGAGAG<br>GAAGAAGAUG<br>GGC | :.....<br>:.....<br>:  | GUCCGUCUUC<br>UUCCUCUCUU<br>UUG | Clea<br>vage | cDNA retrotranspo<br>son protein,<br>putative,<br>unclassified,<br>expressed | 1 |
| GGAGGGAGA<br>GGAAGAAGAT<br>GGGC | LOC_Os<br>10g1685<br>0.1 | 3 | -1 | 1 | 23 | 165 | 187 | GGAGGGAGAG<br>GAAGAAGAUG<br>GGC | :.....<br>:.....<br>:  | GUCCGUCUUC<br>UUCCUCUCUU<br>UUG | Clea<br>vage | cDNA retrotranspo<br>son protein,<br>putative,<br>unclassified,              | 1 |

|                                 |                          |     |    |   |    |     |     |                                 |                       |                                 |              |                                                                                           |   |
|---------------------------------|--------------------------|-----|----|---|----|-----|-----|---------------------------------|-----------------------|---------------------------------|--------------|-------------------------------------------------------------------------------------------|---|
| GGAGGGAGA<br>GGAAGAAGAT<br>GGGC | LOC_Os<br>10g2254<br>0.1 | 2.5 | -1 | 1 | 23 | 165 | 187 | GGAGGGAGAG<br>GAAGAAGAUG<br>GGC | :.....<br>:.....<br>: | GUCCGUCUUC<br>UUCCUCUCUU<br>UCG | Clea<br>vage | expressed<br>cDNA retrotranspo<br>son protein,<br>putative,<br>unclassified,<br>expressed | 1 |
| GGAGGGAGA<br>GGAAGAAGAT<br>GGGC | LOC_Os<br>10g2846<br>0.1 | 2.5 | -1 | 1 | 23 | 165 | 187 | GGAGGGAGAG<br>GAAGAAGAUG<br>GGC | :.....<br>:.....<br>: | GUCCGUCUUC<br>UUCCUCUCUU<br>UCG | Clea<br>vage | expressed<br>cDNA retrotranspo<br>son protein,<br>putative,<br>unclassified,<br>expressed | 1 |
| GGAGGGAGA<br>GGAAGAAGAT<br>GGGC | LOC_Os<br>10g3060<br>0.1 | 1   | -1 | 1 | 23 | 29  | 51  | GGAGGGAGAG<br>GAAGAAGAUG<br>GGC | .....<br>:.....<br>:: | CAUCAUCUUC<br>UUCCUCUCUC<br>UCU | Clea<br>vage | cDNA tyrosine<br>protein kinase<br>domain containing<br>protein, putative,<br>expressed   | 1 |
| GGAGGGAGA<br>GGAAGAAGAT<br>GGGC | LOC_Os<br>10g3060<br>0.2 | 1   | -1 | 1 | 23 | 14  | 36  | GGAGGGAGAG<br>GAAGAAGAUG<br>GGC | .....<br>:.....<br>:: | CAUCAUCUUC<br>UUCCUCUCUC<br>UCU | Clea<br>vage | cDNA tyrosine<br>protein kinase<br>domain containing<br>protein, putative,<br>expressed   | 1 |
| GGAGGGAGA<br>GGAAGAAGAT<br>GGGC | LOC_Os<br>10g3644<br>0.1 | 2.5 | -1 | 1 | 23 | 165 | 187 | GGAGGGAGAG<br>GAAGAAGAUG<br>GGC | :.....<br>:.....<br>: | GUCCGUCUUC<br>UUCCUCUCUU<br>UCG | Clea<br>vage | expressed<br>cDNA retrotranspo<br>son protein,<br>putative,<br>unclassified,<br>expressed | 1 |

|            |         |     |    |   |    |      |     |            |       |            |      |                     |   |
|------------|---------|-----|----|---|----|------|-----|------------|-------|------------|------|---------------------|---|
| GGAGGGAGA  | LOC_Os  | 1.5 | -1 | 1 | 23 | 211  | 233 | GGAGGGAGAG | ..... | CUUCGUCUUC | Clea | cDNA glycoprotei    | 1 |
| GGAAGAAGAT | 10g4125 |     |    |   |    |      |     | GAAGAAGAUG | ..... | UUCUUCUCC  | vage | n, putative,        |   |
| GGGC       | 0.1     |     |    |   |    |      |     | GGC        | ::    | UCC        |      | expressed           |   |
| GGAGGGAGA  | LOC_Os  | 3   | -1 | 1 | 23 | 14   | 36  | GGAGGGAGAG | ....  | GCCCUUCUUC | Clea | cDNA ubiquitin-     | 1 |
| GGAAGAAGAT | 11g0151 |     |    |   |    |      |     | GAAGAAGAUG | ..... | UUCUUCUUCU | vage | activating enzyme,  |   |
| GGGC       | 0.1     |     |    |   |    |      |     | GGC        | .     | UCU        |      | putative, expressed |   |
| GGAGGGAGA  | LOC_Os  | 3   | -1 | 1 | 23 | 13   | 35  | GGAGGGAGAG | ....  | GCCCUUCUUC | Clea | cDNA ubiquitin-     | 1 |
| GGAAGAAGAT | 11g0151 |     |    |   |    |      |     | GAAGAAGAUG | ..... | UUCUUCUUCU | vage | activating enzyme,  |   |
| GGGC       | 0.2     |     |    |   |    |      |     | GGC        | .     | UCU        |      | putative, expressed |   |
| GGAGGGAGA  | LOC_Os  | 3   | -1 | 1 | 23 | 2    | 24  | GGAGGGAGAG | ....  | GCCCUUCUUC | Clea | cDNA ubiquitin-     | 1 |
| GGAAGAAGAT | 11g0151 |     |    |   |    |      |     | GAAGAAGAUG | ..... | UUCUUCUUCU | vage | activating enzyme,  |   |
| GGGC       | 0.3     |     |    |   |    |      |     | GGC        | .     | UCU        |      | putative, expressed |   |
| GGAGGGAGA  | LOC_Os  | 3   | -1 | 1 | 23 | 165  | 187 | GGAGGGAGAG | ..... | GUCCAUCUUC | Clea | cDNA retrotranspo   | 1 |
| GGAAGAAGAT | 11g1270 |     |    |   |    |      |     | GAAGAAGAUG | ....  | UUCCUCCCCU | vage | son protein,        |   |
| GGGC       | 0.1     |     |    |   |    |      |     | GGC        |       | UCG        |      | putative,           |   |
|            |         |     |    |   |    |      |     |            |       |            |      | unclassified,       |   |
|            |         |     |    |   |    |      |     |            |       |            |      | expressed           |   |
| GGAGGGAGA  | LOC_Os  | 2   | -1 | 1 | 23 | 35   | 57  | GGAGGGAGAG | ..... | CCUCAUCUUC | Clea | cDNA expressed      | 2 |
| GGAAGAAGAT | 11g2813 |     |    |   |    |      |     | GAAGAAGAUG | ..... | CUUCUCUCCC | vage | protein             |   |
| GGGC       | 0.1     |     |    |   |    |      |     | GGC        | :     | UCC        |      |                     |   |
| GGAGGGAGA  | LOC_Os  | 1.5 | -1 | 1 | 21 | 1    | 21  | GGAGGGAGAG | ..... | UCAUCUUCUU | Clea | cDNA expressed      | 2 |
| GGAAGAAGAT | 11g2813 |     |    |   |    |      |     | GAAGAAGAUG | ..... | UCUCUCCCUC | vage | protein             |   |
| GGGC       | 0.1     |     |    |   |    |      |     | G          |       | A          |      |                     |   |
| GGAGGGAGA  | LOC_Os  | 1.5 | -1 | 1 | 23 | 1072 | 109 | GGAGGGAGAG | ..... | GCUUAUCCUC | Clea | cDNA retrotranspo   | 1 |
| GGAAGAAGAT | 11g3206 |     |    |   |    |      | 4   | GAAGAAGAUG | ..... | UUCCUCUCC  | vage | son protein,        |   |
| GGGC       | 0.1     |     |    |   |    |      |     | GGC        | :     | UCC        |      | putative,           |   |

|                                 |                          |     |    |   |    |     |     |                                 |                       |                                 |              |                                                                                     |   |
|---------------------------------|--------------------------|-----|----|---|----|-----|-----|---------------------------------|-----------------------|---------------------------------|--------------|-------------------------------------------------------------------------------------|---|
|                                 |                          |     |    |   |    |     |     |                                 |                       |                                 |              | unclassified,<br>expressed                                                          |   |
| GGAGGGAGA<br>GGAAGAAGAT<br>GGGC | LOC_Os<br>11g3442<br>0.1 | 2.5 | -1 | 1 | 23 | 165 | 187 | GGAGGGAGAG<br>GAAGAAGAUG<br>GGC | :.....<br>:.....<br>: | GUCCGUCUUC<br>UUCCUCUCUU<br>UCG | Clea<br>vage | cDNA retrotranspo<br>son protein,<br>putative, Ty3-<br>gypsy subclass,<br>expressed | 1 |
| GGAGGGAGA<br>GGAAGAAGAT<br>GGGC | LOC_Os<br>11g3454<br>0.1 | 2.5 | -1 | 1 | 23 | 165 | 187 | GGAGGGAGAG<br>GAAGAAGAUG<br>GGC | :.....<br>:.....<br>: | GUCCGUCUUC<br>UUCCUCUCUU<br>UCG | Clea<br>vage | cDNA retrotranspo<br>son protein,<br>putative,<br>unclassified,<br>expressed        | 1 |
| GGAGGGAGA<br>GGAAGAAGAT<br>GGGC | LOC_Os<br>11g3459<br>0.1 | 2.5 | -1 | 1 | 23 | 165 | 187 | GGAGGGAGAG<br>GAAGAAGAUG<br>GGC | :.....<br>:.....<br>: | GUCCGUCUUC<br>UUCCUCUCUU<br>UCG | Clea<br>vage | cDNA retrotranspo<br>son protein,<br>putative,<br>unclassified,<br>expressed        | 1 |
| GGAGGGAGA<br>GGAAGAAGAT<br>GGGC | LOC_Os<br>11g4213<br>0.1 | 3   | -1 | 1 | 23 | 165 | 187 | GGAGGGAGAG<br>GAAGAAGAUG<br>GGC | :.....<br>: : :<br>:  | GUCCAUCUUC<br>UUCCUCCCCU<br>UCG | Clea<br>vage | cDNA transposon<br>protein, putative,<br>unclassified                               | 1 |
| GGAGGGAGA<br>GGAAGAAGAT<br>GGGC | LOC_Os<br>11g4568<br>0.1 | 3   | -1 | 1 | 23 | 165 | 187 | GGAGGGAGAG<br>GAAGAAGAUG<br>GGC | :.....<br>: : :<br>:  | GUCCAUCUUC<br>UUCCUCCCCU<br>UCG | Clea<br>vage | cDNA transposon<br>protein, putative,<br>unclassified,<br>expressed                 | 1 |
| GGAGGGAGA<br>GGAAGAAGAT         | LOC_Os<br>11g4720        | 3   | -1 | 1 | 23 | 165 | 187 | GGAGGGAGAG<br>GAAGAAGAUG        | :.....<br>: : :<br>:  | GUCCAUCUUC<br>UUCCUCCCCU        | Clea<br>vage | cDNA transposon<br>protein, putative,                                               | 1 |



|            |         |     |    |   |    |     |     |            |            |            |      |                                                |   |
|------------|---------|-----|----|---|----|-----|-----|------------|------------|------------|------|------------------------------------------------|---|
| GGGC       | 0.1     |     |    |   |    |     |     | GGC        |            | UCG        |      | unclassified,<br>expressed                     |   |
| GGAGGGAGA  | LOC_Os  | 2.5 | -1 | 1 | 23 | 165 | 187 | GGAGGGAGAG | :.....     | GUCCGUCUUC | Clea | cDNA retrotranspo                              | 1 |
| GGAAGAAGAT | 12g0985 |     |    |   |    |     |     | GAAGAAGAUG | :.....     | UUCCUCUCUU | vage | son protein,                                   |   |
| GGGC       | 0.1     |     |    |   |    |     |     | GGC        |            | UCG        |      | putative, Ty3-<br>gypsy subclass,<br>expressed |   |
| GGAGGGAGA  | LOC_Os  | 3   | -1 | 1 | 23 | 165 | 187 | GGAGGGAGAG | :.....     | GUCCAUCUUC | Clea | cDNA transposon                                | 1 |
| GGAAGAAGAT | 12g1215 |     |    |   |    |     |     | GAAGAAGAUG | :... :...: | UUCCUCCCCU | vage | protein, putative,                             |   |
| GGGC       | 0.1     |     |    |   |    |     |     | GGC        |            | UCG        |      | unclassified,<br>expressed                     |   |
| GGAGGGAGA  | LOC_Os  | 2.5 | -1 | 1 | 23 | 165 | 187 | GGAGGGAGAG | :.....     | GUCCGUCUUC | Clea | cDNA retrotranspo                              | 1 |
| GGAAGAAGAT | 12g1569 |     |    |   |    |     |     | GAAGAAGAUG | :.....     | UUCCUCUCUU | vage | son protein,                                   |   |
| GGGC       | 0.1     |     |    |   |    |     |     | GGC        |            | UCG        |      | putative,<br>unclassified,<br>expressed        |   |
| GGAGGGAGA  | LOC_Os  | 2.5 | -1 | 1 | 23 | 430 | 452 | GGAGGGAGAG | :.....     | GUCCGUCUUC | Clea | cDNA retrotranspo                              | 1 |
| GGAAGAAGAT | 12g2172 |     |    |   |    |     |     | GAAGAAGAUG | :.....     | UUCCUCUCUU | vage | son protein,                                   |   |
| GGGC       | 0.1     |     |    |   |    |     |     | GGC        |            | UCG        |      | putative,<br>unclassified,<br>expressed        |   |
| GGAGGGAGA  | LOC_Os  | 3   | -1 | 1 | 23 | 165 | 187 | GGAGGGAGAG | :.....     | GUCCAUCUUC | Clea | cDNA transposon                                | 1 |
| GGAAGAAGAT | 12g3035 |     |    |   |    |     |     | GAAGAAGAUG | :... :...: | UUCCUCCCCU | vage | protein, putative,                             |   |
| GGGC       | 0.1     |     |    |   |    |     |     | GGC        |            | UCG        |      | unclassified                                   |   |
| GGAGGGAGA  | LOC_Os  | 2.5 | -1 | 1 | 23 | 165 | 187 | GGAGGGAGAG | :.....     | GUCCGUCUUC | Clea | cDNA retrotranspo                              | 1 |
| GGAAGAAGAT | 12g3656 |     |    |   |    |     |     | GAAGAAGAUG | :.....     | UUCCUCUCUU | vage | son protein,                                   |   |

|            |         |     |    |   |    |     |     |            |       |            |      |                                         |   |
|------------|---------|-----|----|---|----|-----|-----|------------|-------|------------|------|-----------------------------------------|---|
| GGGC       | 0.1     |     |    |   |    |     |     | GGC        |       | UCG        |      | putative,<br>unclassified,<br>expressed |   |
| GGAGGGAGA  | LOC_Os  | 3   | -1 | 1 | 23 | 165 | 187 | GGAGGGAGAG | ..... | GUCCAUCUUC | Clea | cDNA retrotranspo                       | 1 |
| GGAAGAAGAT | 12g3700 |     |    |   |    |     |     | GAAGAAGAUG | ....  | UUCCUCCCCU | vage | son protein,                            |   |
| GGGC       | 0.1     |     |    |   |    |     |     | GGC        |       | UCG        |      | putative,<br>unclassified               |   |
| GGAGGGAGA  | LOC_Os  | 3   | -1 | 1 | 23 | 165 | 187 | GGAGGGAGAG | ..... | GUCCAUCUUC | Clea | cDNA transposon                         | 1 |
| GGAAGAAGAT | 12g3745 |     |    |   |    |     |     | GAAGAAGAUG | ....  | UUCCUCCCCU | vage | protein, putative,                      |   |
| GGGC       | 0.1     |     |    |   |    |     |     | GGC        |       | UCG        |      | unclassified,<br>expressed              |   |
| GGAGGGAGA  | LOC_Os  | 2.5 | -1 | 1 | 23 | 165 | 187 | GGAGGGAGAG | ..... | GUCCGUCUUC | Clea | cDNA retrotranspo                       | 1 |
| GGAAGAAGAT | 12g4067 |     |    |   |    |     |     | GAAGAAGAUG | ..... | UUCCUCUCUU | vage | son protein,                            |   |
| GGGC       | 0.1     |     |    |   |    |     |     | GGC        |       | UCG        |      | putative,<br>unclassified,<br>expressed |   |
| GGAGGGAGA  | LOC_Os  | 2.5 | -1 | 1 | 23 | 165 | 187 | GGAGGGAGAG | ..... | GUCCGUCUUC | Clea | cDNA retrotranspo                       | 1 |
| GGAAGAAGAT | 12g4269 |     |    |   |    |     |     | GAAGAAGAUG | ..... | UUCCUCUCUU | vage | son protein,                            |   |
| GGGC       | 0.1     |     |    |   |    |     |     | GGC        |       | UCG        |      | putative,<br>unclassified,<br>expressed |   |
| GGAGGGAGA  | LOC_Os  | 1   | -1 | 1 | 23 | 453 | 475 | GGAGGGAGAG | ....  | CUGCAUCUUC | Clea | cDNA sodium/hyd                         | 1 |
| GGAAGAAGAT | 12g4436 |     |    |   |    |     |     | GAAGAAGAUG | ..... | UUCUUCUCC  | vage | rogen exchanger 7,                      |   |
| GGGC       | 0.1     |     |    |   |    |     |     | GGC        | ....  | UCC        |      | putative, expressed                     |   |
| GGAGGGAGA  | LOC_Os  | 1   | -1 | 1 | 23 | 118 | 140 | GGAGGGAGAG | ....  | CUGCAUCUUC | Clea | cDNA sodium/hyd                         | 1 |
| GGAAGAAGAT | 12g4436 |     |    |   |    |     |     | GAAGAAGAUG | ..... | UUCUUCUCC  | vage | rogen exchanger 7,                      |   |

|            |         |   |    |   |    |     |     |            |        |            |      |                     |   |
|------------|---------|---|----|---|----|-----|-----|------------|--------|------------|------|---------------------|---|
| GGGC       | 0.2     |   |    |   |    |     |     | GGC        | :::    | UCC        |      | putative, expressed |   |
| GGAGGGAGA  | LOC_Os  | 1 | -1 | 1 | 23 | 118 | 140 | GGAGGGAGAG | ::::   | CUGCAUCUUC | Clea | cDNA sodium/hyd     | 1 |
| GGAAGAAGAT | 12g4436 |   |    |   |    |     |     | GAAGAAGAUG | :::::: | UUCUUCUUC  | vage | rogen exchanger 7,  |   |
| GGGC       | 0.3     |   |    |   |    |     |     | GGC        | :::    | UCC        |      | putative, expressed |   |
| GGAGGGAGA  | LOC_Os  | 1 | -1 | 1 | 23 | 118 | 140 | GGAGGGAGAG | ::::   | CUGCAUCUUC | Clea | cDNA sodium/hyd     | 1 |
| GGAAGAAGAT | 12g4436 |   |    |   |    |     |     | GAAGAAGAUG | :::::: | UUCUUCUUC  | vage | rogen exchanger 7,  |   |
| GGGC       | 0.4     |   |    |   |    |     |     | GGC        | :::    | UCC        |      | putative, expressed |   |

Most potential targets are labeled red.

Table S2: List of primers used in this article

| Primer name          | Sequence (5'-3')                                     |
|----------------------|------------------------------------------------------|
| Osa-miR11117-Ox F    | CCAAGCTTGGTAGACAACCTCCTATAACCACC                     |
| Osa-miR11117-Ox R    | CGGGATCCCTTAGAGTCAGGGTGGTTGTGT                       |
| Osa-miR11117-mimic-F | CCAAGCTTGCCCATCTTCTTCCTACTCT                         |
| Osa-miR11117-mimic-R | CGGGATCCGGAGGGAGAGTAGGAAGAAG                         |
| Osa-miR11117-GUS-F   | CGGGATCCCCCTTTACTAGACCAGCTTAGCATAT                   |
| Osa-miR11117-GUS-R   | CATGCCATGGTCCTCTCATCCTCCTTTTCACTAGTAG                |
| Osa-miR11117-Biotin  | GCCCATCTTCTTCCTCTCCCTCC-Biotin                       |
| U6-Biotin            | TGCGTGTTCATCCTTGCGCAGGGGCCATGCT-Biotin               |
| Osa-miR11117-STL     | GTCGTATCCAGTGCAGGGTCCGATACGACGCCCATCTGAGGTATTCGCACTG |
| Osa-miR11117-Foward  | GGAGGGAGAGGAAGAAGATGGGC                              |
| U6-F for RT          | CGATAAAATTGGAACGATACAGA                              |

|                             |                                                           |
|-----------------------------|-----------------------------------------------------------|
| U6-R for RT                 | ATTTGGACCATTTCTCGATTTGT                                   |
| ko-Osa-miR11117-T1-F        | TAGGTCTCCCAAAAGTGAGGAGTTTTAGAGCTAGAA                      |
| ko-Osa-miR11117-T1-R        | CGGGTCTCATTTGTATATTCCTGCACCAGCCGGGAA                      |
| ko-Osa-miR11117-T2-F        | TAGGTCTCCTATCGACCAAAGGTTTTAGAGCTAGAA                      |
| koOsa-miR11117-T2-R         | CGGGTCTCAGATAGTCCTATGTGCACCAGCCGGGAA                      |
| L5AD5-F                     | CGGGTCTCAGGCAGGATGGGCAGTCTGGGCAACAAAGCACCAGTGG            |
| L3AD5-R                     | TAGGTCTCCAAACGGATGAGCGACAGCAAACAAAAAAAAAAGCACCGACTCG      |
| Recom-F                     | GTGCAGATGATCCGTGGCAACAAAGCACCAGTGGT                       |
| Recom-R                     | CTATTTCTAGCTCTA AAACAAAAAAAAAAGCACCGACTCGGTG              |
| pRGEb32-cx F                | TTACGCAATTGGACGACAAC                                      |
| pRGEb32-cx R                | CTTCTGGCTGGTTTGTGTTGGT                                    |
| 35S-LOC_Os02g41550.3-GFP-F  | TTGGAGAGAACACGGGGGACTGCGCCCACCCTCGATCT                    |
| 35S-LOC_Os02g41550.3-GFP-R  | CCTCGCCCTTGCTCACCATGCCAGGGACCAAATCCCAC                    |
| 35S-LOC_Os02g57410.10-GFP-F | TTGGAGAGAACACGGGGGACCCACCTCAAAAAAAAAAAAAAAAAAACTCAAGAACAC |
| 35S-LOC_Os02g57410.10-GFP-R | CCTCGCCCTTGCTCACCATGCGATTCCCCGGAATACGATC                  |
| 35S-LOC_Os04g35890.1-GFP-F  | TTGGAGAGAACACGGGGGACATTTCCCCTTCTCCATCTTCT                 |
| 35S-LOC_Os04g35890.1-GFP-R  | CCTCGCCCTTGCTCACCATCCACCACCGCATCGACATT                    |
| 35S-LOC_Os04g56530.1-GFP-F  | TTGGAGAGAACACGGGGGACACGCCCCCGAAAACAAAATAATTAC             |
| 35S-LOC_Os04g56530.1-GFP-R  | CCTCGCCCTTGCTCACCATTAACACCACCAGAACACGAATTCC               |
| 35S-LOC_Os05g35200.2-GFP-F  | TTGGAGAGAACACGGGGGACGGAGAGATACAGAGAGAGGCAGAGGAG           |

|                            |                                                |
|----------------------------|------------------------------------------------|
| 35S-LOC_Os05g35200.2-GFP-R | CCTCGCCCTTGCTCACCATCCCAATGCAAACATGAGCCTGAC     |
| 35S-LOC_Os05g51380.2-GFP-F | TTGGAGAGAACACGGGGGACGGCGAGCTCCATGGGGAAG        |
| 35S-LOC_Os05g51380.2-GFP-R | CCTCGCCCTTGCTCACCATCGGGGAAGATCCGCTTTGAC        |
| 35S-LOC_Os08g01390.1-GFP-F | TTGGAGAGAACACGGGGGACGGAATACACTAGAGTCGGGAAACAGC |
| 35S-LOC_Os08g01390.1-GFP-R | CCTCGCCCTTGCTCACCATCCCAAGTGAAGCAAGAAAAGGAAAC   |
| 35SOsPAO4-GFP-F            | TTGGAGAGAACACGGGGGACGTTCTTCATCTCGATTCCCATACGT  |
| 35SOsPAO4-GFP-R            | CCTCGCCCTTGCTCACCATCTCCAGTTTTTGAGGCTATTGGGA    |
| 35SOsPAO4mts-R1            | ACCTTCTTCCTCTTCGTGTTCCAGACAAGCTAGATCTAGC       |
| 35SOsPAO4mts-F2            | GCTAGATCTAGCTTGTCTGGAACACGAAGAGGAAGAAGGT       |
| Actin-F                    | GAAGATCACTGCCTTGCTCC                           |
| Actin-R                    | CGATAACAGCTCCTCTTGGC                           |
| pOX-OsPAO4 F               | GGGTACCGGCGCGCCAAGCTTATGGATCCCAATAGCCTCAAAA    |
| pOX-OsPAO4 R               | CAATTCACACTTGTAGGATCCTCAGGTCCTGCAAATCTGAAGG    |
| ko-OsPAO4 F1               | TAGGTCTCCTAGCCTCAAAACGTTTTAGAGCTAGAA           |
| ko-OsPAO4 R1               | CGGGTCTCAGCTATTGGGATCTGCACCAGCCGGGAA           |
| ko-OsPAO4 F2               | TAGGTCTCCGCCCAATTGATAGTTTTAGAGCTAGAA           |
| ko-OsPAO4 R2               | CGGGTCTCAGGGCATCCGAAATGCACCAGCCGGGAA           |
| qPCR-OsPAO1 F              | GGATCCTCACGTCCGAGTTC                           |
| qPCR-OsPAO1 R              | CTCGTACGGGAGACCACGA                            |
| qPCR-OsPAO2 F              | GCCGGTAGACATGGTGGTAG                           |

|                |                       |
|----------------|-----------------------|
| qPCR-OsPAO2 R  | CTCCGTCTTGACGGTGACTC  |
| qPCR-OsPAO3 F  | TGAGGAAAATCCCCTGGCAC  |
| qPCR-OsPAO3 R  | ACCAGCTCTTGGGGAACTTG  |
| qPCR-OsPAO4 F  | TGCTTCGTTTGAGGTGACTG  |
| qPCR-OsPAO4 R  | CAATGGTGCCAAGGAGTTCT  |
| qPCR-OsPAO5 F  | GTGCGCTGTCTAATGCTTCG  |
| qPCR-OsPAO5 R  | CTCCTGGGGAACTTGACGAC  |
| qPCR-OsPAO6 F  | CCTACGACTACGAGTTCGCC  |
| qPCR-OsPAO6 R  | AGATCTCACGCACCACCTTG  |
| qPCR-OsPAO7 F  | AGGGCGTCAATGGTGAGAAG  |
| qPCR-OsPAO7 R  | ACTGTCTGAAGTCGGAGAGGA |
| qPCR-OsPR1a F  | GGAAGTACGGCGAGAACATC  |
| qPCR-OsPR1a R  | GGTCGTACCACTGCTTCTCC  |
| qPCR-OsPR1b F  | AGAACTACGCCAGCCAGAGA  |
| qPCR-OsPR1b R  | CAGAAGAGGTTCTCGCCAAG  |
| qPCR-OsPR10a F | GCCAAGCTCAAGGTGGAGTA  |
| qPCR-OsPR10a R | AGTAGCCATCCACGATGTCC  |
| qPCR-OsERF3 R  | CAAACCTTCCGTTTGCATCA  |
| qPCR-OsERF3 F  | CCGGTGTCTACCGTGCTATT  |
| qPCR-OsACO1 F  | GACGTTCCCGGTCATCAACA  |

|               |                        |
|---------------|------------------------|
| qPCR-OsACO1 R | ACGCTTGTAGTGGTCCTTGG   |
| qPCR-OsACO2 F | TTGAGATCCTGAACCACGGC   |
| qPCR-OsACO2 R | CACACGCTTGTAGTGGTCCT   |
| qPCR-OsACO3 F | CGACCAGATCGACACGACAA   |
| qPCR-OsACO3 R | TGGTTCAGCATCTGTGCAGT   |
| qPCR-OsACS1 F | ATGGTGAGCCAAGTGGTCG    |
| qPCR-OsACS1 R | CCCCAGGAAGTAGGACGAGT   |
| HygR-F        | AAGATGTTGGCGACCTCGTATT |
| HygR-R        | CGTGCTTTCAGCTTCGATGTAG |

---
